# Supplementary material
Source: publisher figshare collection journal article supplement (https://acs.figshare.com/ndownloader/files/3994156)
Supplement: Supplementary file 1 [file 3994156]

 
data_1 
 
_audit_creation_method            SHELXL-97 
_chemical_name_systematic 
; 
 ? 
; 
_chemical_name_common             ? 
_chemical_melting_point           ? 
_chemical_formula_moiety          'C9 H27 Cl3 Ge2 Si3, C6 H6'
_chemical_formula_sum 
 'C15 H33 Cl3 Ge2 Si3' 
_chemical_formula_weight          549.21 
 
loop_ 
 _atom_type_symbol 
 _atom_type_description 
 _atom_type_scat_dispersion_real 
 _atom_type_scat_dispersion_imag 
 _atom_type_scat_source 
 'C'  'C'   0.0033   0.0016 
 'International Tables Vol C Tables 4.2.6.8 and 6.1.1.4' 
 'H'  'H'   0.0000   0.0000 
 'International Tables Vol C Tables 4.2.6.8 and 6.1.1.4' 
 'Si'  'Si'   0.0817   0.0704 
 'International Tables Vol C Tables 4.2.6.8 and 6.1.1.4' 
 'Cl'  'Cl'   0.1484   0.1585 
 'International Tables Vol C Tables 4.2.6.8 and 6.1.1.4' 
 'Ge'  'Ge'   0.1547   1.8001 
 'International Tables Vol C Tables 4.2.6.8 and 6.1.1.4' 
 
_symmetry_cell_setting            orthorhombic
_symmetry_space_group_name_H-M    'P b c a'
_symmetry_space_group_name_Hall   '-P 2ac 2ab'
 
loop_ 
 _symmetry_equiv_pos_as_xyz 
 'x, y, z' 
 '-x+1/2, -y, z+1/2' 
 '-x, y+1/2, -z+1/2' 
 'x+1/2, -y+1/2, -z' 
 '-x, -y, -z' 
 'x-1/2, y, -z-1/2' 
 'x, -y-1/2, z-1/2' 
 '-x-1/2, y-1/2, z' 
 
_cell_length_a                    12.8261(9) 
_cell_length_b                    17.2673(12) 
_cell_length_c                    23.4196(16) 
_cell_angle_alpha                 90.00 
_cell_angle_beta                  90.00 
_cell_angle_gamma                 90.00 
_cell_volume                      5186.8(6) 
_cell_formula_units_Z             8 
_cell_measurement_temperature     173(2) 
_cell_measurement_reflns_used     9937
_cell_measurement_theta_min       2.355
_cell_measurement_theta_max       30.062
 
_exptl_crystal_description        block
_exptl_crystal_colour             colourless
_exptl_crystal_size_max           0.25 
_exptl_crystal_size_mid           0.20 
_exptl_crystal_size_min           0.20 
_exptl_crystal_density_meas       ? 
_exptl_crystal_density_diffrn     1.407 
_exptl_crystal_density_method     'not measured' 
_exptl_crystal_F_000              2240 
_exptl_absorpt_coefficient_mu     2.763 
_exptl_absorpt_correction_type    multi-scan
_exptl_absorpt_correction_T_min   0.5450 
_exptl_absorpt_correction_T_max   0.6079 
_exptl_absorpt_process_details    'SADABS (Bruker, 2004)'
 
_exptl_special_details 
; 
 ? 
; 
 
_diffrn_ambient_temperature       173(2) 
_diffrn_radiation_wavelength      0.71073 
_diffrn_radiation_type            MoK\a 
_diffrn_radiation_source          'fine-focus sealed tube' 
_diffrn_radiation_monochromator   graphite 
_diffrn_measurement_device_type   'Bruker SMART APEX II'
_diffrn_measurement_method        \w
_diffrn_detector_area_resol_mean  ? 
_diffrn_standards_number          0
_diffrn_standards_interval_count  ? 
_diffrn_standards_interval_time   0
_diffrn_standards_decay_%         0
_diffrn_reflns_number             51157 
_diffrn_reflns_av_R_equivalents   0.0381 
_diffrn_reflns_av_sigmaI/netI     0.0224 
_diffrn_reflns_limit_h_min        -16 
_diffrn_reflns_limit_h_max        16 
_diffrn_reflns_limit_k_min        -22 
_diffrn_reflns_limit_k_max        22 
_diffrn_reflns_limit_l_min        -30 
_diffrn_reflns_limit_l_max        30 
_diffrn_reflns_theta_min          2.36 
_diffrn_reflns_theta_max          28.00 
_reflns_number_total              6255 
_reflns_number_gt                 5037 
_reflns_threshold_expression      I>2\s(I) 
 
_computing_data_collection        ? 
_computing_cell_refinement        ? 
_computing_data_reduction         ? 
_computing_structure_solution     'SHELXS-97 (Sheldrick, 1990)' 
_computing_structure_refinement   'SHELXL-97 (Sheldrick, 1997)' 
_computing_molecular_graphics     ? 
_computing_publication_material   ? 
 
_refine_special_details 
; 
 Refinement of F^2^ against ALL reflections.  The weighted R-factor wR and 
 goodness of fit S are based on F^2^, conventional R-factors R are based 
 on F, with F set to zero for negative F^2^. The threshold expression of 
 F^2^ > 2sigma(F^2^) is used only for calculating R-factors(gt) etc. and is 
 not relevant to the choice of reflections for refinement.  R-factors based 
 on F^2^ are statistically about twice as large as those based on F, and R- 
 factors based on ALL data will be even larger. 
; 
 
_refine_ls_structure_factor_coef  Fsqd  
_refine_ls_matrix_type            full 
_refine_ls_weighting_scheme       calc  
_refine_ls_weighting_details 
 'calc w=1/[\s^2^(Fo^2^)+(0.0292P)^2^+0.3464P] where P=(Fo^2^+2Fc^2^)/3' 
_atom_sites_solution_primary      direct 
_atom_sites_solution_secondary    difmap 
_atom_sites_solution_hydrogens    geom 
_refine_ls_hydrogen_treatment     constr
_refine_ls_extinction_method      none 
_refine_ls_extinction_coef        ? 
_refine_ls_number_reflns          6255 
_refine_ls_number_parameters      217 
_refine_ls_number_restraints      0 
_refine_ls_R_factor_all           0.0338 
_refine_ls_R_factor_gt            0.0225 
_refine_ls_wR_factor_ref          0.0559 
_refine_ls_wR_factor_gt           0.0533 
_refine_ls_goodness_of_fit_ref    1.036 
_refine_ls_restrained_S_all       1.036 
_refine_ls_shift/su_max           0.002 
_refine_ls_shift/su_mean          0.000 
 
loop_ 
 _atom_site_label 
 _atom_site_type_symbol 
 _atom_site_fract_x 
 _atom_site_fract_y 
 _atom_site_fract_z 
 _atom_site_U_iso_or_equiv 
 _atom_site_adp_type 
 _atom_site_occupancy 
 _atom_site_symmetry_multiplicity 
 _atom_site_calc_flag 
 _atom_site_refinement_flags 
 _atom_site_disorder_assembly 
 _atom_site_disorder_group 
Ge1 Ge 0.231052(12) 0.221460(9) 0.375202(7) 0.02149(5) Uani 1 1 d . . . 
Ge2 Ge 0.385732(12) 0.300520(9) 0.374277(7) 0.02345(5) Uani 1 1 d . . . 
Cl1 Cl 0.52730(3) 0.24100(3) 0.34948(2) 0.03844(11) Uani 1 1 d . . . 
Cl2 Cl 0.42714(3) 0.35292(3) 0.455067(18) 0.03743(10) Uani 1 1 d . . . 
Cl3 Cl 0.38163(3) 0.39955(3) 0.317474(19) 0.03859(11) Uani 1 1 d . . . 
Si1 Si 0.24485(3) 0.14916(3) 0.461785(19) 0.02706(10) Uani 1 1 d . . . 
Si2 Si 0.09402(3) 0.31485(3) 0.374417(18) 0.02480(9) Uani 1 1 d . . . 
Si3 Si 0.24283(3) 0.14772(3) 0.289144(19) 0.02669(10) Uani 1 1 d . . . 
C11 C 0.14943(15) 0.06834(10) 0.45395(8) 0.0426(5) Uani 1 1 d . . . 
H11A H 0.1511 0.0359 0.4883 0.064 Uiso 1 1 calc R . . 
H11B H 0.1679 0.0370 0.4205 0.064 Uiso 1 1 calc R . . 
H11C H 0.0792 0.0897 0.4489 0.064 Uiso 1 1 calc R . . 
C12 C 0.38054(14) 0.11165(11) 0.47007(8) 0.0434(5) Uani 1 1 d . . . 
H12A H 0.3838 0.0772 0.5032 0.065 Uiso 1 1 calc R . . 
H12B H 0.4285 0.1552 0.4756 0.065 Uiso 1 1 calc R . . 
H12C H 0.4005 0.0829 0.4357 0.065 Uiso 1 1 calc R . . 
C13 C 0.21014(14) 0.21219(10) 0.52330(7) 0.0377(4) Uani 1 1 d . . . 
H13A H 0.2131 0.1819 0.5587 0.057 Uiso 1 1 calc R . . 
H13B H 0.1395 0.2325 0.5180 0.057 Uiso 1 1 calc R . . 
H13C H 0.2596 0.2554 0.5256 0.057 Uiso 1 1 calc R . . 
C21 C -0.02637(13) 0.26207(11) 0.39656(8) 0.0380(4) Uani 1 1 d . . . 
H21A H -0.0860 0.2975 0.3954 0.057 Uiso 1 1 calc R . . 
H21B H -0.0176 0.2423 0.4355 0.057 Uiso 1 1 calc R . . 
H21C H -0.0387 0.2187 0.3704 0.057 Uiso 1 1 calc R . . 
C22 C 0.12327(14) 0.39411(10) 0.42592(8) 0.0378(4) Uani 1 1 d . . . 
H22A H 0.0650 0.4308 0.4267 0.057 Uiso 1 1 calc R . . 
H22B H 0.1869 0.4211 0.4141 0.057 Uiso 1 1 calc R . . 
H22C H 0.1333 0.3722 0.4641 0.057 Uiso 1 1 calc R . . 
C23 C 0.07918(14) 0.35383(10) 0.30069(7) 0.0357(4) Uani 1 1 d . . . 
H23A H 0.0237 0.3929 0.3002 0.054 Uiso 1 1 calc R . . 
H23B H 0.0611 0.3116 0.2746 0.054 Uiso 1 1 calc R . . 
H23C H 0.1449 0.3776 0.2885 0.054 Uiso 1 1 calc R . . 
C31 C 0.10830(13) 0.11052(11) 0.27653(8) 0.0390(4) Uani 1 1 d . . . 
H31A H 0.1082 0.0767 0.2430 0.058 Uiso 1 1 calc R . . 
H31B H 0.0609 0.1542 0.2700 0.058 Uiso 1 1 calc R . . 
H31C H 0.0850 0.0812 0.3100 0.058 Uiso 1 1 calc R . . 
C32 C 0.33539(14) 0.06584(10) 0.29923(8) 0.0423(5) Uani 1 1 d . . . 
H32A H 0.3402 0.0359 0.2638 0.063 Uiso 1 1 calc R . . 
H32B H 0.3103 0.0323 0.3300 0.063 Uiso 1 1 calc R . . 
H32C H 0.4044 0.0862 0.3092 0.063 Uiso 1 1 calc R . . 
C33 C 0.28647(15) 0.21067(11) 0.22898(7) 0.0411(4) Uani 1 1 d . . . 
H33A H 0.2875 0.1805 0.1936 0.062 Uiso 1 1 calc R . . 
H33B H 0.3566 0.2303 0.2370 0.062 Uiso 1 1 calc R . . 
H33C H 0.2382 0.2543 0.2248 0.062 Uiso 1 1 calc R . . 
C1 C 0.2988(2) 0.43959(13) 0.59251(10) 0.0656(7) Uani 1 1 d . . . 
H1A H 0.3295 0.4000 0.5699 0.079 Uiso 1 1 calc R . . 
C2 C 0.1932(2) 0.44054(14) 0.60095(10) 0.0633(6) Uani 1 1 d . . . 
H2A H 0.1504 0.4018 0.5842 0.076 Uiso 1 1 calc R . . 
C3 C 0.14952(19) 0.49775(15) 0.63370(9) 0.0612(7) Uani 1 1 d . . . 
H3A H 0.0763 0.4989 0.6397 0.073 Uiso 1 1 calc R . . 
C4 C 0.21155(19) 0.55300(13) 0.65758(10) 0.0583(6) Uani 1 1 d . . . 
H4A H 0.1813 0.5925 0.6805 0.070 Uiso 1 1 calc R . . 
C5 C 0.31616(19) 0.55204(13) 0.64895(9) 0.0570(6) Uani 1 1 d . . . 
H5A H 0.3587 0.5910 0.6656 0.068 Uiso 1 1 calc R . . 
C6 C 0.36043(19) 0.49559(15) 0.61652(10) 0.0615(6) Uani 1 1 d . . . 
H6A H 0.4337 0.4950 0.6106 0.074 Uiso 1 1 calc R . . 
 
loop_ 
 _atom_site_aniso_label 
 _atom_site_aniso_U_11 
 _atom_site_aniso_U_22 
 _atom_site_aniso_U_33 
 _atom_site_aniso_U_23 
 _atom_site_aniso_U_13 
 _atom_site_aniso_U_12 
Ge1 0.02276(9) 0.02120(9) 0.02051(9) -0.00041(6) -0.00017(6) 0.00013(6) 
Ge2 0.02231(9) 0.02378(9) 0.02426(9) -0.00062(7) 0.00054(6) -0.00071(6) 
Cl1 0.0287(2) 0.0419(2) 0.0447(3) -0.0052(2) 0.00572(19) 0.00629(18) 
Cl2 0.0389(2) 0.0419(2) 0.0315(2) -0.00964(18) -0.00524(18) -0.00272(19) 
Cl3 0.0414(2) 0.0333(2) 0.0411(3) 0.01180(19) 0.00131(19) -0.00264(19) 
Si1 0.0317(2) 0.0260(2) 0.0234(2) 0.00283(18) -0.00148(18) -0.00181(18) 
Si2 0.0236(2) 0.0256(2) 0.0251(2) -0.00093(18) -0.00020(17) 0.00191(17) 
Si3 0.0306(2) 0.0259(2) 0.0235(2) -0.00339(18) 0.00026(18) -0.00032(18) 
C11 0.0530(12) 0.0351(10) 0.0397(10) 0.0048(8) 0.0015(9) -0.0123(9) 
C12 0.0462(11) 0.0396(11) 0.0444(11) 0.0031(9) -0.0117(9) 0.0092(9) 
C13 0.0416(10) 0.0463(11) 0.0251(9) -0.0016(8) 0.0019(8) -0.0051(8) 
C21 0.0264(9) 0.0475(11) 0.0402(10) 0.0034(9) 0.0025(8) -0.0021(8) 
C22 0.0392(10) 0.0335(10) 0.0408(10) -0.0092(8) -0.0005(8) 0.0039(8) 
C23 0.0368(9) 0.0382(10) 0.0322(9) 0.0045(8) -0.0039(8) 0.0069(8) 
C31 0.0400(10) 0.0379(10) 0.0391(10) -0.0066(8) -0.0067(8) -0.0054(8) 
C32 0.0470(11) 0.0318(10) 0.0481(11) -0.0083(8) 0.0027(9) 0.0090(8) 
C33 0.0501(11) 0.0465(11) 0.0269(9) -0.0002(8) 0.0065(8) -0.0057(9) 
C1 0.098(2) 0.0486(14) 0.0506(14) -0.0003(11) 0.0221(14) 0.0139(14) 
C2 0.0856(18) 0.0577(15) 0.0467(13) 0.0064(11) -0.0086(13) -0.0225(14) 
C3 0.0470(13) 0.0822(18) 0.0543(15) 0.0195(13) 0.0006(10) 0.0014(13) 
C4 0.0715(16) 0.0539(14) 0.0495(14) 0.0004(11) 0.0094(12) 0.0158(12) 
C5 0.0680(15) 0.0538(13) 0.0494(13) 0.0037(11) -0.0042(11) -0.0140(12) 
C6 0.0470(13) 0.0787(18) 0.0589(15) 0.0178(13) 0.0130(11) 0.0068(12) 
 
_geom_special_details 
; 
 All esds (except the esd in the dihedral angle between two l.s. planes) 
 are estimated using the full covariance matrix.  The cell esds are taken 
 into account individually in the estimation of esds in distances, angles 
 and torsion angles; correlations between esds in cell parameters are only 
 used when they are defined by crystal symmetry.  An approximate (isotropic) 
 treatment of cell esds is used for estimating esds involving l.s. planes. 
; 
 
loop_ 
 _geom_bond_atom_site_label_1 
 _geom_bond_atom_site_label_2 
 _geom_bond_distance 
 _geom_bond_site_symmetry_2 
 _geom_bond_publ_flag 
Ge1 Si2 2.3853(5) . ? 
Ge1 Si1 2.3878(5) . ? 
Ge1 Si3 2.3887(5) . ? 
Ge1 Ge2 2.4083(2) . ? 
Ge2 Cl2 2.1635(4) . ? 
Ge2 Cl1 2.1658(4) . ? 
Ge2 Cl3 2.1671(5) . ? 
Si1 C13 1.8596(17) . ? 
Si1 C11 1.8652(17) . ? 
Si1 C12 1.8671(18) . ? 
Si2 C22 1.8624(17) . ? 
Si2 C23 1.8629(16) . ? 
Si2 C21 1.8666(17) . ? 
Si3 C32 1.8613(17) . ? 
Si3 C31 1.8647(17) . ? 
Si3 C33 1.8655(18) . ? 
C11 H11A 0.9800 . ? 
C11 H11B 0.9800 . ? 
C11 H11C 0.9800 . ? 
C12 H12A 0.9800 . ? 
C12 H12B 0.9800 . ? 
C12 H12C 0.9800 . ? 
C13 H13A 0.9800 . ? 
C13 H13B 0.9800 . ? 
C13 H13C 0.9800 . ? 
C21 H21A 0.9800 . ? 
C21 H21B 0.9800 . ? 
C21 H21C 0.9800 . ? 
C22 H22A 0.9800 . ? 
C22 H22B 0.9800 . ? 
C22 H22C 0.9800 . ? 
C23 H23A 0.9800 . ? 
C23 H23B 0.9800 . ? 
C23 H23C 0.9800 . ? 
C31 H31A 0.9800 . ? 
C31 H31B 0.9800 . ? 
C31 H31C 0.9800 . ? 
C32 H32A 0.9800 . ? 
C32 H32B 0.9800 . ? 
C32 H32C 0.9800 . ? 
C33 H33A 0.9800 . ? 
C33 H33B 0.9800 . ? 
C33 H33C 0.9800 . ? 
C1 C6 1.369(3) . ? 
C1 C2 1.370(3) . ? 
C1 H1A 0.9500 . ? 
C2 C3 1.370(3) . ? 
C2 H2A 0.9500 . ? 
C3 C4 1.362(3) . ? 
C3 H3A 0.9500 . ? 
C4 C5 1.357(3) . ? 
C4 H4A 0.9500 . ? 
C5 C6 1.360(3) . ? 
C5 H5A 0.9500 . ? 
C6 H6A 0.9500 . ? 
 
loop_ 
 _geom_angle_atom_site_label_1 
 _geom_angle_atom_site_label_2 
 _geom_angle_atom_site_label_3 
 _geom_angle 
 _geom_angle_site_symmetry_1 
 _geom_angle_site_symmetry_3 
 _geom_angle_publ_flag 
Si2 Ge1 Si1 114.495(16) . . ? 
Si2 Ge1 Si3 113.605(16) . . ? 
Si1 Ge1 Si3 115.667(18) . . ? 
Si2 Ge1 Ge2 102.926(14) . . ? 
Si1 Ge1 Ge2 104.061(13) . . ? 
Si3 Ge1 Ge2 104.033(13) . . ? 
Cl2 Ge2 Cl1 103.131(19) . . ? 
Cl2 Ge2 Cl3 102.287(19) . . ? 
Cl1 Ge2 Cl3 103.306(19) . . ? 
Cl2 Ge2 Ge1 115.559(14) . . ? 
Cl1 Ge2 Ge1 115.093(15) . . ? 
Cl3 Ge2 Ge1 115.643(14) . . ? 
C13 Si1 C11 110.92(8) . . ? 
C13 Si1 C12 110.22(8) . . ? 
C11 Si1 C12 111.24(9) . . ? 
C13 Si1 Ge1 109.52(6) . . ? 
C11 Si1 Ge1 105.01(6) . . ? 
C12 Si1 Ge1 109.80(6) . . ? 
C22 Si2 C23 110.81(8) . . ? 
C22 Si2 C21 110.21(8) . . ? 
C23 Si2 C21 110.45(8) . . ? 
C22 Si2 Ge1 110.08(6) . . ? 
C23 Si2 Ge1 109.07(6) . . ? 
C21 Si2 Ge1 106.10(6) . . ? 
C32 Si3 C31 110.40(8) . . ? 
C32 Si3 C33 110.31(9) . . ? 
C31 Si3 C33 111.02(9) . . ? 
C32 Si3 Ge1 109.77(6) . . ? 
C31 Si3 Ge1 105.00(6) . . ? 
C33 Si3 Ge1 110.22(6) . . ? 
Si1 C11 H11A 109.5 . . ? 
Si1 C11 H11B 109.5 . . ? 
H11A C11 H11B 109.5 . . ? 
Si1 C11 H11C 109.5 . . ? 
H11A C11 H11C 109.5 . . ? 
H11B C11 H11C 109.5 . . ? 
Si1 C12 H12A 109.5 . . ? 
Si1 C12 H12B 109.5 . . ? 
H12A C12 H12B 109.5 . . ? 
Si1 C12 H12C 109.5 . . ? 
H12A C12 H12C 109.5 . . ? 
H12B C12 H12C 109.5 . . ? 
Si1 C13 H13A 109.5 . . ? 
Si1 C13 H13B 109.5 . . ? 
H13A C13 H13B 109.5 . . ? 
Si1 C13 H13C 109.5 . . ? 
H13A C13 H13C 109.5 . . ? 
H13B C13 H13C 109.5 . . ? 
Si2 C21 H21A 109.5 . . ? 
Si2 C21 H21B 109.5 . . ? 
H21A C21 H21B 109.5 . . ? 
Si2 C21 H21C 109.5 . . ? 
H21A C21 H21C 109.5 . . ? 
H21B C21 H21C 109.5 . . ? 
Si2 C22 H22A 109.5 . . ? 
Si2 C22 H22B 109.5 . . ? 
H22A C22 H22B 109.5 . . ? 
Si2 C22 H22C 109.5 . . ? 
H22A C22 H22C 109.5 . . ? 
H22B C22 H22C 109.5 . . ? 
Si2 C23 H23A 109.5 . . ? 
Si2 C23 H23B 109.5 . . ? 
H23A C23 H23B 109.5 . . ? 
Si2 C23 H23C 109.5 . . ? 
H23A C23 H23C 109.5 . . ? 
H23B C23 H23C 109.5 . . ? 
Si3 C31 H31A 109.5 . . ? 
Si3 C31 H31B 109.5 . . ? 
H31A C31 H31B 109.5 . . ? 
Si3 C31 H31C 109.5 . . ? 
H31A C31 H31C 109.5 . . ? 
H31B C31 H31C 109.5 . . ? 
Si3 C32 H32A 109.5 . . ? 
Si3 C32 H32B 109.5 . . ? 
H32A C32 H32B 109.5 . . ? 
Si3 C32 H32C 109.5 . . ? 
H32A C32 H32C 109.5 . . ? 
H32B C32 H32C 109.5 . . ? 
Si3 C33 H33A 109.5 . . ? 
Si3 C33 H33B 109.5 . . ? 
H33A C33 H33B 109.5 . . ? 
Si3 C33 H33C 109.5 . . ? 
H33A C33 H33C 109.5 . . ? 
H33B C33 H33C 109.5 . . ? 
C6 C1 C2 120.2(2) . . ? 
C6 C1 H1A 119.9 . . ? 
C2 C1 H1A 119.9 . . ? 
C1 C2 C3 119.6(2) . . ? 
C1 C2 H2A 120.2 . . ? 
C3 C2 H2A 120.2 . . ? 
C4 C3 C2 119.7(2) . . ? 
C4 C3 H3A 120.1 . . ? 
C2 C3 H3A 120.1 . . ? 
C5 C4 C3 120.5(2) . . ? 
C5 C4 H4A 119.7 . . ? 
C3 C4 H4A 119.7 . . ? 
C4 C5 C6 120.3(2) . . ? 
C4 C5 H5A 119.8 . . ? 
C6 C5 H5A 119.8 . . ? 
C5 C6 C1 119.6(2) . . ? 
C5 C6 H6A 120.2 . . ? 
C1 C6 H6A 120.2 . . ? 
 
_diffrn_measured_fraction_theta_max    1.000 
_diffrn_reflns_theta_full              28.00 
_diffrn_measured_fraction_theta_full   1.000 
_refine_diff_density_max    0.313 
_refine_diff_density_min   -0.219 
_refine_diff_density_rms    0.056

#===END
 
data_3 
 
_audit_creation_method            SHELXL-97 
_chemical_name_systematic 
; 
Tris(pentafluorophenyl)germanium chloride
; 
_chemical_name_common             ? 
_chemical_melting_point           ? 
_chemical_formula_moiety          'C18 Cl F15 Ge'
_chemical_formula_sum 
 'C18 Cl F15 Ge' 
_chemical_formula_weight          609.22 
 
loop_ 
 _atom_type_symbol 
 _atom_type_description 
 _atom_type_scat_dispersion_real 
 _atom_type_scat_dispersion_imag 
 _atom_type_scat_source 
 'C'  'C'   0.0033   0.0016 
 'International Tables Vol C Tables 4.2.6.8 and 6.1.1.4' 
 'F'  'F'   0.0171   0.0103 
 'International Tables Vol C Tables 4.2.6.8 and 6.1.1.4' 
 'Cl'  'Cl'   0.1484   0.1585 
 'International Tables Vol C Tables 4.2.6.8 and 6.1.1.4' 
 'Ge'  'Ge'   0.1547   1.8001 
 'International Tables Vol C Tables 4.2.6.8 and 6.1.1.4' 
 
_symmetry_cell_setting            trigonal
_symmetry_space_group_name_H-M    'R -3'
_symmetry_space_group_name_Hall   '-R 3'
 
loop_ 
 _symmetry_equiv_pos_as_xyz 
 'x, y, z' 
 '-y, x-y, z' 
 '-x+y, -x, z' 
 'x+2/3, y+1/3, z+1/3' 
 '-y+2/3, x-y+1/3, z+1/3' 
 '-x+y+2/3, -x+1/3, z+1/3' 
 'x+1/3, y+2/3, z+2/3' 
 '-y+1/3, x-y+2/3, z+2/3' 
 '-x+y+1/3, -x+2/3, z+2/3' 
 '-x, -y, -z' 
 'y, -x+y, -z' 
 'x-y, x, -z' 
 '-x+2/3, -y+1/3, -z+1/3' 
 'y+2/3, -x+y+1/3, -z+1/3' 
 'x-y+2/3, x+1/3, -z+1/3' 
 '-x+1/3, -y+2/3, -z+2/3' 
 'y+1/3, -x+y+2/3, -z+2/3' 
 'x-y+1/3, x+2/3, -z+2/3' 
 
_cell_length_a                    11.2711(10) 
_cell_length_b                    11.2711(10) 
_cell_length_c                    25.930(5) 
_cell_angle_alpha                 90.00 
_cell_angle_beta                  90.00 
_cell_angle_gamma                 120.00 
_cell_volume                      2852.8(6) 
_cell_formula_units_Z             6 
_cell_measurement_temperature     173(2) 
_cell_measurement_reflns_used     4166
_cell_measurement_theta_min       2.229
_cell_measurement_theta_max       30.364
 
_exptl_crystal_description        block
_exptl_crystal_colour             colourless
_exptl_crystal_size_max           0.20 
_exptl_crystal_size_mid           0.15 
_exptl_crystal_size_min           0.10 
_exptl_crystal_density_meas       ? 
_exptl_crystal_density_diffrn     2.128 
_exptl_crystal_density_method     'not measured' 
_exptl_crystal_F_000              1752 
_exptl_absorpt_coefficient_mu     1.901 
_exptl_absorpt_correction_type    multi-scan
_exptl_absorpt_correction_T_min   0.7024 
_exptl_absorpt_correction_T_max   0.8327 
_exptl_absorpt_process_details    'SADABS (Bruker, 2004)'
 
_exptl_special_details 
; 
 ? 
; 
 
_diffrn_ambient_temperature       173(2) 
_diffrn_radiation_wavelength      0.71073 
_diffrn_radiation_type            MoK\a 
_diffrn_radiation_source          'fine-focus sealed tube' 
_diffrn_radiation_monochromator   graphite 
_diffrn_measurement_device_type   'Bruker SMART APEX II'
_diffrn_measurement_method        \w
_diffrn_detector_area_resol_mean  ? 
_diffrn_standards_number          0
_diffrn_standards_interval_count  ? 
_diffrn_standards_interval_time   0
_diffrn_standards_decay_%         0
_diffrn_reflns_number             7974 
_diffrn_reflns_av_R_equivalents   0.0305 
_diffrn_reflns_av_sigmaI/netI     0.0274 
_diffrn_reflns_limit_h_min        -15 
_diffrn_reflns_limit_h_max        15 
_diffrn_reflns_limit_k_min        -15 
_diffrn_reflns_limit_k_max        15 
_diffrn_reflns_limit_l_min        -36 
_diffrn_reflns_limit_l_max        36 
_diffrn_reflns_theta_min          2.23 
_diffrn_reflns_theta_max          30.00 
_reflns_number_total              1805 
_reflns_number_gt                 1605 
_reflns_threshold_expression      I>2\s(I) 
 
_computing_data_collection        ? 
_computing_cell_refinement        ? 
_computing_data_reduction         ? 
_computing_structure_solution     'SHELXS-97 (Sheldrick, 1990)' 
_computing_structure_refinement   'SHELXL-97 (Sheldrick, 1997)' 
_computing_molecular_graphics     ? 
_computing_publication_material   ? 
 
_refine_special_details 
; 
 Refinement of F^2^ against ALL reflections.  The weighted R-factor wR and 
 goodness of fit S are based on F^2^, conventional R-factors R are based 
 on F, with F set to zero for negative F^2^. The threshold expression of 
 F^2^ > 2sigma(F^2^) is used only for calculating R-factors(gt) etc. and is 
 not relevant to the choice of reflections for refinement.  R-factors based 
 on F^2^ are statistically about twice as large as those based on F, and R- 
 factors based on ALL data will be even larger. 
; 
 
_refine_ls_structure_factor_coef  Fsqd  
_refine_ls_matrix_type            full 
_refine_ls_weighting_scheme       calc  
_refine_ls_weighting_details 
 'calc w=1/[\s^2^(Fo^2^)+(0.0379P)^2^+0.7653P] where P=(Fo^2^+2Fc^2^)/3' 
_atom_sites_solution_primary      direct 
_atom_sites_solution_secondary    difmap 
_atom_sites_solution_hydrogens    ?
_refine_ls_hydrogen_treatment     ?
_refine_ls_extinction_method      none 
_refine_ls_extinction_coef        ? 
_refine_ls_number_reflns          1805 
_refine_ls_number_parameters      106 
_refine_ls_number_restraints      0 
_refine_ls_R_factor_all           0.0293 
_refine_ls_R_factor_gt            0.0251 
_refine_ls_wR_factor_ref          0.0690 
_refine_ls_wR_factor_gt           0.0680 
_refine_ls_goodness_of_fit_ref    1.077 
_refine_ls_restrained_S_all       1.077 
_refine_ls_shift/su_max           0.002 
_refine_ls_shift/su_mean          0.000 
 
loop_ 
 _atom_site_label 
 _atom_site_type_symbol 
 _atom_site_fract_x 
 _atom_site_fract_y 
 _atom_site_fract_z 
 _atom_site_U_iso_or_equiv 
 _atom_site_adp_type 
 _atom_site_occupancy 
 _atom_site_symmetry_multiplicity 
 _atom_site_calc_flag 
 _atom_site_refinement_flags 
 _atom_site_disorder_assembly 
 _atom_site_disorder_group 
Ge1 Ge 0.3333 0.6667 0.553555(9) 0.02001(9) Uani 1 3 d S . . 
Cl1 Cl 0.3333 0.6667 0.47039(2) 0.03205(16) Uani 1 3 d S . . 
C1 C 0.49389(15) 0.83671(15) 0.57396(5) 0.0214(3) Uani 1 1 d . . . 
C2 C 0.49150(15) 0.93527(15) 0.60503(5) 0.0221(3) Uani 1 1 d . . . 
C3 C 0.60808(16) 1.05612(15) 0.61747(6) 0.0253(3) Uani 1 1 d . . . 
C4 C 0.73224(17) 1.08017(16) 0.59861(6) 0.0277(3) Uani 1 1 d . . . 
C5 C 0.74006(16) 0.98405(17) 0.56813(6) 0.0272(3) Uani 1 1 d . . . 
C6 C 0.62119(16) 0.86478(16) 0.55643(6) 0.0247(3) Uani 1 1 d . . . 
F2 F 0.37251(10) 0.91345(10) 0.62556(3) 0.0303(2) Uani 1 1 d . . . 
F3 F 0.60164(11) 1.14806(11) 0.64798(4) 0.0382(2) Uani 1 1 d . . . 
F4 F 0.84642(11) 1.19696(11) 0.60977(5) 0.0412(3) Uani 1 1 d . . . 
F5 F 0.86082(10) 1.00810(12) 0.55066(4) 0.0408(3) Uani 1 1 d . . . 
F6 F 0.63032(10) 0.77123(11) 0.52700(4) 0.0359(2) Uani 1 1 d . . . 
 
loop_ 
 _atom_site_aniso_label 
 _atom_site_aniso_U_11 
 _atom_site_aniso_U_22 
 _atom_site_aniso_U_33 
 _atom_site_aniso_U_23 
 _atom_site_aniso_U_13 
 _atom_site_aniso_U_12 
Ge1 0.01874(11) 0.01874(11) 0.02257(14) 0.000 0.000 0.00937(5) 
Cl1 0.0372(2) 0.0372(2) 0.0217(3) 0.000 0.000 0.01861(12) 
C1 0.0197(7) 0.0185(6) 0.0244(6) 0.0016(5) 0.0021(5) 0.0083(5) 
C2 0.0209(7) 0.0214(7) 0.0246(6) 0.0028(5) 0.0026(5) 0.0110(6) 
C3 0.0280(8) 0.0202(7) 0.0290(7) -0.0021(5) -0.0030(6) 0.0130(6) 
C4 0.0224(7) 0.0197(7) 0.0350(8) 0.0036(6) -0.0031(6) 0.0060(6) 
C5 0.0174(7) 0.0270(8) 0.0356(8) 0.0055(6) 0.0029(6) 0.0099(6) 
C6 0.0232(7) 0.0229(7) 0.0291(7) 0.0004(5) 0.0035(5) 0.0125(6) 
F2 0.0243(5) 0.0296(5) 0.0374(5) -0.0048(4) 0.0066(4) 0.0138(4) 
F3 0.0386(6) 0.0270(5) 0.0491(6) -0.0141(4) -0.0043(5) 0.0163(5) 
F4 0.0235(5) 0.0250(5) 0.0617(7) -0.0044(5) -0.0072(5) 0.0021(4) 
F5 0.0194(5) 0.0412(6) 0.0593(7) 0.0023(5) 0.0081(4) 0.0132(5) 
F6 0.0291(5) 0.0337(5) 0.0455(6) -0.0095(4) 0.0077(4) 0.0161(5) 
 
_geom_special_details 
; 
 All esds (except the esd in the dihedral angle between two l.s. planes) 
 are estimated using the full covariance matrix.  The cell esds are taken 
 into account individually in the estimation of esds in distances, angles 
 and torsion angles; correlations between esds in cell parameters are only 
 used when they are defined by crystal symmetry.  An approximate (isotropic) 
 treatment of cell esds is used for estimating esds involving l.s. planes. 
; 
 
loop_ 
 _geom_bond_atom_site_label_1 
 _geom_bond_atom_site_label_2 
 _geom_bond_distance 
 _geom_bond_site_symmetry_2 
 _geom_bond_publ_flag 
Ge1 C1 1.9390(15) 2_665 ? 
Ge1 C1 1.9391(15) . ? 
Ge1 C1 1.9391(15) 3_565 ? 
Ge1 Cl1 2.1566(8) . ? 
C1 C6 1.383(2) . ? 
C1 C2 1.383(2) . ? 
C2 F2 1.3463(17) . ? 
C2 C3 1.377(2) . ? 
C3 F3 1.3343(17) . ? 
C3 C4 1.375(2) . ? 
C4 F4 1.3337(18) . ? 
C4 C5 1.379(2) . ? 
C5 F5 1.3276(17) . ? 
C5 C6 1.376(2) . ? 
C6 F6 1.3465(18) . ? 
 
loop_ 
 _geom_angle_atom_site_label_1 
 _geom_angle_atom_site_label_2 
 _geom_angle_atom_site_label_3 
 _geom_angle 
 _geom_angle_site_symmetry_1 
 _geom_angle_site_symmetry_3 
 _geom_angle_publ_flag 
C1 Ge1 C1 112.85(4) 2_665 . ? 
C1 Ge1 C1 112.85(4) 2_665 3_565 ? 
C1 Ge1 C1 112.85(4) . 3_565 ? 
C1 Ge1 Cl1 105.84(4) 2_665 . ? 
C1 Ge1 Cl1 105.84(4) . . ? 
C1 Ge1 Cl1 105.84(4) 3_565 . ? 
C6 C1 C2 116.26(14) . . ? 
C6 C1 Ge1 119.03(11) . . ? 
C2 C1 Ge1 124.71(11) . . ? 
F2 C2 C3 117.32(13) . . ? 
F2 C2 C1 120.08(13) . . ? 
C3 C2 C1 122.59(14) . . ? 
F3 C3 C4 120.19(14) . . ? 
F3 C3 C2 120.76(14) . . ? 
C4 C3 C2 119.04(14) . . ? 
F4 C4 C3 120.13(15) . . ? 
F4 C4 C5 119.38(15) . . ? 
C3 C4 C5 120.49(15) . . ? 
F5 C5 C6 121.49(15) . . ? 
F5 C5 C4 119.80(15) . . ? 
C6 C5 C4 118.72(14) . . ? 
F6 C6 C5 118.15(13) . . ? 
F6 C6 C1 118.95(14) . . ? 
C5 C6 C1 122.90(14) . . ? 
 
_diffrn_measured_fraction_theta_max    0.975 
_diffrn_reflns_theta_full              30.00 
_diffrn_measured_fraction_theta_full   0.975 
_refine_diff_density_max    0.462 
_refine_diff_density_min   -0.344 
_refine_diff_density_rms    0.059 

#===END
 
data_5 
 
_audit_creation_method            SHELXL-97 
_chemical_name_systematic 
; 
 ? 
; 
_chemical_name_common             ? 
_chemical_melting_point           ? 
_chemical_formula_moiety          'C39 H21 F15 Ge2, 0.25(C H Cl3)'
_chemical_formula_sum 
 'C39.25 H21.25 Cl0.75 F15 Ge2' 
_chemical_formula_weight          949.58 
 
loop_ 
 _atom_type_symbol 
 _atom_type_description 
 _atom_type_scat_dispersion_real 
 _atom_type_scat_dispersion_imag 
 _atom_type_scat_source 
 'C'  'C'   0.0033   0.0016 
 'International Tables Vol C Tables 4.2.6.8 and 6.1.1.4' 
 'H'  'H'   0.0000   0.0000 
 'International Tables Vol C Tables 4.2.6.8 and 6.1.1.4' 
 'F'  'F'   0.0171   0.0103 
 'International Tables Vol C Tables 4.2.6.8 and 6.1.1.4' 
 'Cl'  'Cl'   0.1484   0.1585 
 'International Tables Vol C Tables 4.2.6.8 and 6.1.1.4' 
 'Ge'  'Ge'   0.1547   1.8001 
 'International Tables Vol C Tables 4.2.6.8 and 6.1.1.4' 
 
_symmetry_cell_setting            trigonal
_symmetry_space_group_name_H-M    'P -3'
_symmetry_space_group_name_Hall   '-P 3'
 
loop_ 
 _symmetry_equiv_pos_as_xyz 
 'x, y, z' 
 '-y, x-y, z' 
 '-x+y, -x, z' 
 '-x, -y, -z' 
 'y, -x+y, -z' 
 'x-y, x, -z' 
 
_cell_length_a                    16.5688(15) 
_cell_length_b                    16.5688(15) 
_cell_length_c                    8.2300(15) 
_cell_angle_alpha                 90.00 
_cell_angle_beta                  90.00 
_cell_angle_gamma                 120.00 
_cell_volume                      1956.6(4) 
_cell_formula_units_Z             2 
_cell_measurement_temperature     150(2) 
_cell_measurement_reflns_used     4977
_cell_measurement_theta_min       2.457
_cell_measurement_theta_max       26.665
 
_exptl_crystal_description        block
_exptl_crystal_colour             colourless
_exptl_crystal_size_max           0.40 
_exptl_crystal_size_mid           0.20 
_exptl_crystal_size_min           0.20 
_exptl_crystal_density_meas       ? 
_exptl_crystal_density_diffrn     1.612 
_exptl_crystal_density_method     'not measured' 
_exptl_crystal_F_000              937 
_exptl_absorpt_coefficient_mu     1.687 
_exptl_absorpt_correction_type    multi-scan
_exptl_absorpt_correction_T_min   0.5518 
_exptl_absorpt_correction_T_max   0.7290 
_exptl_absorpt_process_details    'SADABS (Bruker, 2004)'
 
_exptl_special_details 
; 
 ? 
; 
 
_diffrn_ambient_temperature       150(2) 
_diffrn_radiation_wavelength      0.71073 
_diffrn_radiation_type            MoK\a 
_diffrn_radiation_source          'fine-focus sealed tube' 
_diffrn_radiation_monochromator   graphite 
_diffrn_measurement_device_type   'Bruker SMART APEX II'
_diffrn_measurement_method        \w
_diffrn_detector_area_resol_mean  ? 
_diffrn_standards_number          0
_diffrn_standards_interval_count  ? 
_diffrn_standards_interval_time   0
_diffrn_standards_decay_%         0
_diffrn_reflns_number             14677 
_diffrn_reflns_av_R_equivalents   0.0500 
_diffrn_reflns_av_sigmaI/netI     0.0354 
_diffrn_reflns_limit_h_min        -20 
_diffrn_reflns_limit_h_max        20 
_diffrn_reflns_limit_k_min        -20 
_diffrn_reflns_limit_k_max        20 
_diffrn_reflns_limit_l_min        -10 
_diffrn_reflns_limit_l_max        10 
_diffrn_reflns_theta_min          2.46 
_diffrn_reflns_theta_max          26.00 
_reflns_number_total              2580 
_reflns_number_gt                 2097 
_reflns_threshold_expression      I>2\s(I) 
 
_computing_data_collection        ? 
_computing_cell_refinement        ? 
_computing_data_reduction         ? 
_computing_structure_solution     'SHELXS-97 (Sheldrick, 1990)' 
_computing_structure_refinement   'SHELXL-97 (Sheldrick, 1997)' 
_computing_molecular_graphics     ? 
_computing_publication_material   ? 
 
_refine_special_details 
; 
 Refinement of F^2^ against ALL reflections.  The weighted R-factor wR and 
 goodness of fit S are based on F^2^, conventional R-factors R are based 
 on F, with F set to zero for negative F^2^. The threshold expression of 
 F^2^ > 2sigma(F^2^) is used only for calculating R-factors(gt) etc. and is 
 not relevant to the choice of reflections for refinement.  R-factors based 
 on F^2^ are statistically about twice as large as those based on F, and R- 
 factors based on ALL data will be even larger. 
; 
 
_refine_ls_structure_factor_coef  Fsqd  
_refine_ls_matrix_type            full 
_refine_ls_weighting_scheme       calc  
_refine_ls_weighting_details 
 'calc w=1/[\s^2^(Fo^2^)+(0.0958P)^2^+1.9564P] where P=(Fo^2^+2Fc^2^)/3' 
_atom_sites_solution_primary      direct 
_atom_sites_solution_secondary    difmap 
_atom_sites_solution_hydrogens    geom 
_refine_ls_hydrogen_treatment     constr
_refine_ls_extinction_method      none 
_refine_ls_extinction_coef        ? 
_refine_ls_number_reflns          2580 
_refine_ls_number_parameters      176 
_refine_ls_number_restraints      0 
_refine_ls_R_factor_all           0.0638 
_refine_ls_R_factor_gt            0.0484 
_refine_ls_wR_factor_ref          0.1635 
_refine_ls_wR_factor_gt           0.1556 
_refine_ls_goodness_of_fit_ref    1.185 
_refine_ls_restrained_S_all       1.185 
_refine_ls_shift/su_max           0.000 
_refine_ls_shift/su_mean          0.000 
 
loop_ 
 _atom_site_label 
 _atom_site_type_symbol 
 _atom_site_fract_x 
 _atom_site_fract_y 
 _atom_site_fract_z 
 _atom_site_U_iso_or_equiv 
 _atom_site_adp_type 
 _atom_site_occupancy 
 _atom_site_symmetry_multiplicity 
 _atom_site_calc_flag 
 _atom_site_refinement_flags 
 _atom_site_disorder_assembly 
 _atom_site_disorder_group 
Ge1 Ge 0.6667 0.3333 0.87660(8) 0.0220(2) Uani 1 3 d S . . 
Ge2 Ge 0.6667 0.3333 0.57707(8) 0.0242(2) Uani 1 3 d S . . 
F2 F 0.61376(17) 0.45958(17) 1.1092(3) 0.0324(6) Uani 1 1 d . . . 
F3 F 0.44878(19) 0.44699(18) 1.1512(3) 0.0383(6) Uani 1 1 d . . . 
F4 F 0.29357(19) 0.3064(2) 1.0095(4) 0.0492(8) Uani 1 1 d . . . 
F5 F 0.30512(18) 0.17270(19) 0.8390(4) 0.0424(7) Uani 1 1 d . . . 
F6 F 0.47135(17) 0.18215(16) 0.8016(3) 0.0305(6) Uani 1 1 d . . . 
C1 C 0.5484(3) 0.3205(3) 0.9518(5) 0.0238(8) Uani 1 1 d . . . 
C2 C 0.5391(3) 0.3866(3) 1.0410(5) 0.0249(8) Uani 1 1 d . . . 
C3 C 0.4541(3) 0.3819(3) 1.0636(5) 0.0290(9) Uani 1 1 d . . . 
C4 C 0.3764(3) 0.3112(3) 0.9940(6) 0.0319(10) Uani 1 1 d . . . 
C5 C 0.3817(3) 0.2417(3) 0.9067(5) 0.0290(9) Uani 1 1 d . . . 
C6 C 0.4675(3) 0.2493(3) 0.8895(5) 0.0262(9) Uani 1 1 d . . . 
C11 C 0.5475(3) 0.3186(3) 0.5100(5) 0.0267(9) Uani 1 1 d . . . 
C12 C 0.5177(3) 0.3795(3) 0.5626(6) 0.0317(9) Uani 1 1 d . . . 
H12 H 0.5592 0.4336 0.6225 0.038 Uiso 1 1 calc R . . 
C13 C 0.4286(4) 0.3623(4) 0.5287(6) 0.0382(11) Uani 1 1 d . . . 
H13 H 0.4096 0.4047 0.5655 0.046 Uiso 1 1 calc R . . 
C14 C 0.3667(3) 0.2836(3) 0.4412(6) 0.0375(11) Uani 1 1 d . . . 
C15 C 0.3970(3) 0.2254(3) 0.3830(6) 0.0384(11) Uani 1 1 d . . . 
H15 H 0.3564 0.1734 0.3178 0.046 Uiso 1 1 calc R . . 
C16 C 0.4861(3) 0.2413(3) 0.4180(5) 0.0322(9) Uani 1 1 d . . . 
H16 H 0.5051 0.1994 0.3791 0.039 Uiso 1 1 calc R . . 
C17 C 0.2683(4) 0.2638(5) 0.4084(8) 0.0594(16) Uani 1 1 d . . . 
H17A H 0.2686 0.3227 0.3956 0.089 Uiso 1 1 calc R . . 
H17B H 0.2279 0.2288 0.4997 0.089 Uiso 1 1 calc R . . 
H17C H 0.2448 0.2269 0.3086 0.089 Uiso 1 1 calc R . . 
Cl1 Cl 0.0969(6) 0.0960(6) 0.7648(11) 0.087(2) Uiso 0.25 1 d P . . 
C7 C 0.0000 0.0000 0.685(9) 0.11(2) Uiso 0.25 3 d SP . . 
H7 H 0.0000 0.0000 0.5637 0.126 Uiso 0.25 3 calc SPR . . 
 
loop_ 
 _atom_site_aniso_label 
 _atom_site_aniso_U_11 
 _atom_site_aniso_U_22 
 _atom_site_aniso_U_33 
 _atom_site_aniso_U_23 
 _atom_site_aniso_U_13 
 _atom_site_aniso_U_12 
Ge1 0.0235(3) 0.0235(3) 0.0190(4) 0.000 0.000 0.01175(14) 
Ge2 0.0265(3) 0.0265(3) 0.0194(4) 0.000 0.000 0.01327(15) 
F2 0.0332(13) 0.0332(13) 0.0269(13) -0.0084(10) -0.0027(10) 0.0138(11) 
F3 0.0473(16) 0.0367(14) 0.0392(15) 0.0000(12) 0.0116(12) 0.0274(13) 
F4 0.0322(15) 0.0523(17) 0.071(2) -0.0031(15) 0.0076(14) 0.0271(14) 
F5 0.0271(13) 0.0369(14) 0.0570(18) -0.0084(13) -0.0043(12) 0.0114(11) 
F6 0.0345(13) 0.0268(12) 0.0304(13) -0.0048(10) 0.0008(10) 0.0156(10) 
C1 0.028(2) 0.0260(19) 0.0183(18) 0.0022(16) 0.0019(16) 0.0145(16) 
C2 0.031(2) 0.0258(19) 0.0178(19) 0.0031(15) 0.0020(16) 0.0140(17) 
C3 0.038(2) 0.029(2) 0.025(2) 0.0039(17) 0.0070(18) 0.0207(19) 
C4 0.031(2) 0.036(2) 0.035(2) 0.0065(19) 0.0085(19) 0.0213(19) 
C5 0.025(2) 0.028(2) 0.030(2) 0.0011(17) 0.0010(17) 0.0108(17) 
C6 0.033(2) 0.025(2) 0.022(2) 0.0037(16) 0.0042(17) 0.0158(17) 
C11 0.032(2) 0.031(2) 0.0185(19) 0.0038(16) 0.0016(17) 0.0165(18) 
C12 0.035(2) 0.034(2) 0.029(2) 0.0034(18) -0.0002(18) 0.0195(19) 
C13 0.046(3) 0.047(3) 0.032(2) 0.008(2) 0.005(2) 0.031(2) 
C14 0.034(2) 0.047(3) 0.033(2) 0.010(2) -0.001(2) 0.022(2) 
C15 0.040(3) 0.039(3) 0.029(2) 0.002(2) -0.009(2) 0.014(2) 
C16 0.033(2) 0.036(2) 0.026(2) 0.0022(18) -0.0005(18) 0.0157(19) 
C17 0.041(3) 0.084(4) 0.059(4) 0.005(3) -0.008(3) 0.035(3) 
 
_geom_special_details 
; 
 All esds (except the esd in the dihedral angle between two l.s. planes) 
 are estimated using the full covariance matrix.  The cell esds are taken 
 into account individually in the estimation of esds in distances, angles 
 and torsion angles; correlations between esds in cell parameters are only 
 used when they are defined by crystal symmetry.  An approximate (isotropic) 
 treatment of cell esds is used for estimating esds involving l.s. planes. 
; 
 
loop_ 
 _geom_bond_atom_site_label_1 
 _geom_bond_atom_site_label_2 
 _geom_bond_distance 
 _geom_bond_site_symmetry_2 
 _geom_bond_publ_flag 
Ge1 C1 1.963(4) 3_665 ? 
Ge1 C1 1.963(4) . ? 
Ge1 C1 1.963(4) 2_655 ? 
Ge1 Ge2 2.4652(11) . ? 
Ge2 C11 1.944(4) 2_655 ? 
Ge2 C11 1.944(4) 3_665 ? 
Ge2 C11 1.944(4) . ? 
F2 C2 1.346(5) . ? 
F3 C3 1.336(5) . ? 
F4 C4 1.341(5) . ? 
F5 C5 1.333(5) . ? 
F6 C6 1.355(5) . ? 
C1 C6 1.367(6) . ? 
C1 C2 1.389(6) . ? 
C2 C3 1.384(6) . ? 
C3 C4 1.359(6) . ? 
C4 C5 1.396(6) . ? 
C5 C6 1.371(6) . ? 
C11 C16 1.394(6) . ? 
C11 C12 1.396(6) . ? 
C12 C13 1.386(7) . ? 
C12 H12 0.9500 . ? 
C13 C14 1.390(7) . ? 
C13 H13 0.9500 . ? 
C14 C15 1.378(7) . ? 
C14 C17 1.518(7) . ? 
C15 C16 1.394(7) . ? 
C15 H15 0.9500 . ? 
C16 H16 0.9500 . ? 
C17 H17A 0.9800 . ? 
C17 H17B 0.9800 . ? 
C17 H17C 0.9800 . ? 
Cl1 C7 1.73(3) . ? 
C7 Cl1 1.73(3) 3 ? 
C7 Cl1 1.73(3) 2 ? 
C7 H7 1.0000 . ? 
 
loop_ 
 _geom_angle_atom_site_label_1 
 _geom_angle_atom_site_label_2 
 _geom_angle_atom_site_label_3 
 _geom_angle 
 _geom_angle_site_symmetry_1 
 _geom_angle_site_symmetry_3 
 _geom_angle_publ_flag 
C1 Ge1 C1 110.54(11) 3_665 . ? 
C1 Ge1 C1 110.53(11) 3_665 2_655 ? 
C1 Ge1 C1 110.54(11) . 2_655 ? 
C1 Ge1 Ge2 108.38(12) 3_665 . ? 
C1 Ge1 Ge2 108.38(12) . . ? 
C1 Ge1 Ge2 108.38(12) 2_655 . ? 
C11 Ge2 C11 112.27(11) 2_655 3_665 ? 
C11 Ge2 C11 112.27(11) 2_655 . ? 
C11 Ge2 C11 112.27(11) 3_665 . ? 
C11 Ge2 Ge1 106.50(12) 2_655 . ? 
C11 Ge2 Ge1 106.50(12) 3_665 . ? 
C11 Ge2 Ge1 106.50(12) . . ? 
C6 C1 C2 115.5(4) . . ? 
C6 C1 Ge1 118.0(3) . . ? 
C2 C1 Ge1 125.5(3) . . ? 
F2 C2 C3 116.6(3) . . ? 
F2 C2 C1 120.9(4) . . ? 
C3 C2 C1 122.6(4) . . ? 
F3 C3 C4 120.5(4) . . ? 
F3 C3 C2 120.2(4) . . ? 
C4 C3 C2 119.3(4) . . ? 
F4 C4 C3 120.7(4) . . ? 
F4 C4 C5 119.0(4) . . ? 
C3 C4 C5 120.3(4) . . ? 
F5 C5 C6 122.3(4) . . ? 
F5 C5 C4 119.8(4) . . ? 
C6 C5 C4 117.8(4) . . ? 
F6 C6 C1 118.8(4) . . ? 
F6 C6 C5 116.9(4) . . ? 
C1 C6 C5 124.4(4) . . ? 
C16 C11 C12 118.2(4) . . ? 
C16 C11 Ge2 119.9(3) . . ? 
C12 C11 Ge2 121.7(3) . . ? 
C13 C12 C11 121.0(4) . . ? 
C13 C12 H12 119.5 . . ? 
C11 C12 H12 119.5 . . ? 
C12 C13 C14 120.5(4) . . ? 
C12 C13 H13 119.8 . . ? 
C14 C13 H13 119.8 . . ? 
C15 C14 C13 118.8(4) . . ? 
C15 C14 C17 120.9(5) . . ? 
C13 C14 C17 120.3(5) . . ? 
C14 C15 C16 121.2(4) . . ? 
C14 C15 H15 119.4 . . ? 
C16 C15 H15 119.4 . . ? 
C11 C16 C15 120.3(4) . . ? 
C11 C16 H16 119.9 . . ? 
C15 C16 H16 119.9 . . ? 
C14 C17 H17A 109.5 . . ? 
C14 C17 H17B 109.5 . . ? 
H17A C17 H17B 109.5 . . ? 
C14 C17 H17C 109.5 . . ? 
H17A C17 H17C 109.5 . . ? 
H17B C17 H17C 109.5 . . ? 
Cl1 C7 Cl1 107(3) . 3 ? 
Cl1 C7 Cl1 107(3) . 2 ? 
Cl1 C7 Cl1 107(3) 3 2 ? 
Cl1 C7 H7 112.3 . . ? 
Cl1 C7 H7 112.3 3 . ? 
Cl1 C7 H7 112.3 2 . ? 
 
loop_ 
 _geom_torsion_atom_site_label_1 
 _geom_torsion_atom_site_label_2 
 _geom_torsion_atom_site_label_3 
 _geom_torsion_atom_site_label_4 
 _geom_torsion 
 _geom_torsion_site_symmetry_1 
 _geom_torsion_site_symmetry_2 
 _geom_torsion_site_symmetry_3 
 _geom_torsion_site_symmetry_4 
 _geom_torsion_publ_flag 
C1 Ge1 Ge2 C11 119.13(17) 3_665 . . 2_655 ? 
C1 Ge1 Ge2 C11 -120.87(17) . . . 2_655 ? 
C1 Ge1 Ge2 C11 -0.87(17) 2_655 . . 2_655 ? 
C1 Ge1 Ge2 C11 -0.87(17) 3_665 . . 3_665 ? 
C1 Ge1 Ge2 C11 119.13(17) . . . 3_665 ? 
C1 Ge1 Ge2 C11 -120.87(17) 2_655 . . 3_665 ? 
C1 Ge1 Ge2 C11 -120.88(17) 3_665 . . . ? 
C1 Ge1 Ge2 C11 -0.87(17) . . . . ? 
C1 Ge1 Ge2 C11 119.13(17) 2_655 . . . ? 
C1 Ge1 C1 C6 170.0(3) 3_665 . . . ? 
C1 Ge1 C1 C6 -67.3(4) 2_655 . . . ? 
Ge2 Ge1 C1 C6 51.4(3) . . . . ? 
C1 Ge1 C1 C2 2.1(5) 3_665 . . . ? 
C1 Ge1 C1 C2 124.8(2) 2_655 . . . ? 
Ge2 Ge1 C1 C2 -116.6(3) . . . . ? 
C6 C1 C2 F2 179.6(3) . . . . ? 
Ge1 C1 C2 F2 -12.2(5) . . . . ? 
C6 C1 C2 C3 -1.0(6) . . . . ? 
Ge1 C1 C2 C3 167.2(3) . . . . ? 
F2 C2 C3 F3 -0.9(6) . . . . ? 
C1 C2 C3 F3 179.7(4) . . . . ? 
F2 C2 C3 C4 178.2(4) . . . . ? 
C1 C2 C3 C4 -1.2(6) . . . . ? 
F3 C3 C4 F4 1.2(6) . . . . ? 
C2 C3 C4 F4 -177.9(4) . . . . ? 
F3 C3 C4 C5 -178.1(4) . . . . ? 
C2 C3 C4 C5 2.9(6) . . . . ? 
F4 C4 C5 F5 0.7(6) . . . . ? 
C3 C4 C5 F5 179.9(4) . . . . ? 
F4 C4 C5 C6 178.6(4) . . . . ? 
C3 C4 C5 C6 -2.2(7) . . . . ? 
C2 C1 C6 F6 -179.8(3) . . . . ? 
Ge1 C1 C6 F6 11.1(5) . . . . ? 
C2 C1 C6 C5 1.7(6) . . . . ? 
Ge1 C1 C6 C5 -167.4(3) . . . . ? 
F5 C5 C6 F6 -0.9(6) . . . . ? 
C4 C5 C6 F6 -178.7(4) . . . . ? 
F5 C5 C6 C1 177.6(4) . . . . ? 
C4 C5 C6 C1 -0.2(7) . . . . ? 
C11 Ge2 C11 C16 -2.7(4) 2_655 . . . ? 
C11 Ge2 C11 C16 124.9(2) 3_665 . . . ? 
Ge1 Ge2 C11 C16 -118.9(3) . . . . ? 
C11 Ge2 C11 C12 172.0(3) 2_655 . . . ? 
C11 Ge2 C11 C12 -60.4(5) 3_665 . . . ? 
Ge1 Ge2 C11 C12 55.8(4) . . . . ? 
C16 C11 C12 C13 1.9(6) . . . . ? 
Ge2 C11 C12 C13 -172.8(3) . . . . ? 
C11 C12 C13 C14 0.0(7) . . . . ? 
C12 C13 C14 C15 -2.8(7) . . . . ? 
C12 C13 C14 C17 178.3(5) . . . . ? 
C13 C14 C15 C16 3.6(7) . . . . ? 
C17 C14 C15 C16 -177.5(5) . . . . ? 
C12 C11 C16 C15 -1.2(6) . . . . ? 
Ge2 C11 C16 C15 173.7(3) . . . . ? 
C14 C15 C16 C11 -1.6(7) . . . . ? 
 
_diffrn_measured_fraction_theta_max    1.000 
_diffrn_reflns_theta_full              26.00 
_diffrn_measured_fraction_theta_full   1.000 
_refine_diff_density_max    1.897 
_refine_diff_density_min   -0.424 
_refine_diff_density_rms    0.139 

#===END
 
data_6 
 
_audit_creation_method            SHELXL-97 
_chemical_name_systematic 
; 
 ? 
; 
_chemical_name_common             ? 
_chemical_melting_point           ? 
_chemical_formula_moiety          'C54 H42 F10 Ge3'
_chemical_formula_sum 
 'C54 H42 F10 Ge3' 
_chemical_formula_weight          1098.65 
 
loop_ 
 _atom_type_symbol 
 _atom_type_description 
 _atom_type_scat_dispersion_real 
 _atom_type_scat_dispersion_imag 
 _atom_type_scat_source 
 'C'  'C'   0.0033   0.0016 
 'International Tables Vol C Tables 4.2.6.8 and 6.1.1.4' 
 'H'  'H'   0.0000   0.0000 
 'International Tables Vol C Tables 4.2.6.8 and 6.1.1.4' 
 'F'  'F'   0.0171   0.0103 
 'International Tables Vol C Tables 4.2.6.8 and 6.1.1.4' 
 'Ge'  'Ge'   0.1547   1.8001 
 'International Tables Vol C Tables 4.2.6.8 and 6.1.1.4' 
 
_symmetry_cell_setting            monoclinic
_symmetry_space_group_name_H-M    'C 2/c'
_symmetry_space_group_name_Hall   '-C 2yc'
 
loop_ 
 _symmetry_equiv_pos_as_xyz 
 'x, y, z' 
 '-x, y, -z+1/2' 
 'x+1/2, y+1/2, z' 
 '-x+1/2, y+1/2, -z+1/2' 
 '-x, -y, -z' 
 'x, -y, z-1/2' 
 '-x+1/2, -y+1/2, -z' 
 'x+1/2, -y+1/2, z-1/2' 
 
_cell_length_a                    20.334(4) 
_cell_length_b                    10.6788(19) 
_cell_length_c                    21.741(4) 
_cell_angle_alpha                 90.00 
_cell_angle_beta                  96.284(3) 
_cell_angle_gamma                 90.00 
_cell_volume                      4692.6(14) 
_cell_formula_units_Z             4 
_cell_measurement_temperature     173(2) 
_cell_measurement_reflns_used     4827
_cell_measurement_theta_min       2.157
_cell_measurement_theta_max       27.433
 
_exptl_crystal_description        block
_exptl_crystal_colour             colourless
_exptl_crystal_size_max           0.40 
_exptl_crystal_size_mid           0.08 
_exptl_crystal_size_min           0.04 
_exptl_crystal_density_meas       ? 
_exptl_crystal_density_diffrn     1.555 
_exptl_crystal_density_method     'not measured' 
_exptl_crystal_F_000              2208 
_exptl_absorpt_coefficient_mu     1.986 
_exptl_absorpt_correction_type    multi-scan
_exptl_absorpt_correction_T_min   0.5038 
_exptl_absorpt_correction_T_max   0.9248 
_exptl_absorpt_process_details    'SADABS (Bruker, 2004)'
 
_exptl_special_details 
; 
 ? 
; 
 
_diffrn_ambient_temperature       173(2) 
_diffrn_radiation_wavelength      0.71073 
_diffrn_radiation_type            MoK\a 
_diffrn_radiation_source          'fine-focus sealed tube' 
_diffrn_radiation_monochromator   graphite 
_diffrn_measurement_device_type   'Bruker SMART APEX II'
_diffrn_measurement_method        \w
_diffrn_detector_area_resol_mean  ? 
_diffrn_standards_number          0
_diffrn_standards_interval_count  ? 
_diffrn_standards_interval_time   0
_diffrn_standards_decay_%         0
_diffrn_reflns_number             15821 
_diffrn_reflns_av_R_equivalents   0.0380 
_diffrn_reflns_av_sigmaI/netI     0.0381 
_diffrn_reflns_limit_h_min        -23 
_diffrn_reflns_limit_h_max        24 
_diffrn_reflns_limit_k_min        -12 
_diffrn_reflns_limit_k_max        12 
_diffrn_reflns_limit_l_min        -24 
_diffrn_reflns_limit_l_max        26 
_diffrn_reflns_theta_min          2.16 
_diffrn_reflns_theta_max          25.50 
_reflns_number_total              4338 
_reflns_number_gt                 3614 
_reflns_threshold_expression      I>2\s(I) 
 
_computing_data_collection        ? 
_computing_cell_refinement        ? 
_computing_data_reduction         ? 
_computing_structure_solution     'SHELXS-97 (Sheldrick, 1990)' 
_computing_structure_refinement   'SHELXL-97 (Sheldrick, 1997)' 
_computing_molecular_graphics     ? 
_computing_publication_material   ? 
 
_refine_special_details 
; 
 Refinement of F^2^ against ALL reflections.  The weighted R-factor wR and 
 goodness of fit S are based on F^2^, conventional R-factors R are based 
 on F, with F set to zero for negative F^2^. The threshold expression of 
 F^2^ > 2sigma(F^2^) is used only for calculating R-factors(gt) etc. and is 
 not relevant to the choice of reflections for refinement.  R-factors based 
 on F^2^ are statistically about twice as large as those based on F, and R- 
 factors based on ALL data will be even larger. 
; 
 
_refine_ls_structure_factor_coef  Fsqd  
_refine_ls_matrix_type            full 
_refine_ls_weighting_scheme       calc  
_refine_ls_weighting_details 
 'calc w=1/[\s^2^(Fo^2^)+(0.1061P)^2^+0.0000P] where P=(Fo^2^+2Fc^2^)/3' 
_atom_sites_solution_primary      direct 
_atom_sites_solution_secondary    difmap 
_atom_sites_solution_hydrogens    geom 
_refine_ls_hydrogen_treatment     constr
_refine_ls_extinction_method      none 
_refine_ls_extinction_coef        ? 
_refine_ls_number_reflns          4338 
_refine_ls_number_parameters      306 
_refine_ls_number_restraints      0 
_refine_ls_R_factor_all           0.0529 
_refine_ls_R_factor_gt            0.0433 
_refine_ls_wR_factor_ref          0.1416 
_refine_ls_wR_factor_gt           0.1363 
_refine_ls_goodness_of_fit_ref    1.023 
_refine_ls_restrained_S_all       1.023 
_refine_ls_shift/su_max           0.001 
_refine_ls_shift/su_mean          0.000 
 
loop_ 
 _atom_site_label 
 _atom_site_type_symbol 
 _atom_site_fract_x 
 _atom_site_fract_y 
 _atom_site_fract_z 
 _atom_site_U_iso_or_equiv 
 _atom_site_adp_type 
 _atom_site_occupancy 
 _atom_site_symmetry_multiplicity 
 _atom_site_calc_flag 
 _atom_site_refinement_flags 
 _atom_site_disorder_assembly 
 _atom_site_disorder_group 
Ge1 Ge 0.5000 0.42433(4) 0.7500 0.02640(18) Uani 1 2 d S . . 
Ge2 Ge 0.565368(18) 0.31640(3) 0.677390(18) 0.02573(16) Uani 1 1 d . . . 
F12 F 0.64015(11) 0.3864(2) 0.81878(11) 0.0417(6) Uani 1 1 d . . . 
F13 F 0.71060(13) 0.5191(3) 0.90824(12) 0.0567(7) Uani 1 1 d . . . 
F14 F 0.66146(15) 0.7382(3) 0.94826(13) 0.0630(8) Uani 1 1 d . . . 
F15 F 0.54194(14) 0.8212(2) 0.89804(14) 0.0573(8) Uani 1 1 d . . . 
F16 F 0.47157(12) 0.69075(19) 0.80842(13) 0.0486(7) Uani 1 1 d . . . 
C11 C 0.55419(18) 0.5340(3) 0.80992(18) 0.0313(8) Uani 1 1 d . . . 
C12 C 0.6145(2) 0.4952(3) 0.83741(19) 0.0353(9) Uani 1 1 d . . . 
C13 C 0.6512(2) 0.5601(4) 0.8838(2) 0.0404(10) Uani 1 1 d . . . 
C14 C 0.6266(2) 0.6702(4) 0.9044(2) 0.0463(11) Uani 1 1 d . . . 
C15 C 0.5661(2) 0.7129(4) 0.8786(2) 0.0434(11) Uani 1 1 d . . . 
C16 C 0.5307(2) 0.6452(3) 0.8322(2) 0.0359(9) Uani 1 1 d . . . 
C21 C 0.50599(17) 0.2669(3) 0.60453(17) 0.0273(8) Uani 1 1 d . . . 
C22 C 0.48055(19) 0.3535(3) 0.56022(19) 0.0337(9) Uani 1 1 d . . . 
H22A H 0.4899 0.4399 0.5669 0.040 Uiso 1 1 calc R . . 
C23 C 0.4424(2) 0.3173(3) 0.5073(2) 0.0366(10) Uani 1 1 d . . . 
H23A H 0.4254 0.3790 0.4783 0.044 Uiso 1 1 calc R . . 
C24 C 0.42804(18) 0.1912(3) 0.49526(19) 0.0334(9) Uani 1 1 d . . . 
C25 C 0.45292(18) 0.1045(3) 0.53951(19) 0.0325(9) Uani 1 1 d . . . 
H25A H 0.4436 0.0181 0.5328 0.039 Uiso 1 1 calc R . . 
C26 C 0.49084(17) 0.1410(3) 0.59293(17) 0.0285(8) Uani 1 1 d . . . 
H26A H 0.5069 0.0795 0.6224 0.034 Uiso 1 1 calc R . . 
C27 C 0.3877(2) 0.1505(4) 0.4370(2) 0.0452(10) Uani 1 1 d . . . 
H27A H 0.4088 0.1797 0.4012 0.068 Uiso 1 1 calc R . . 
H27B H 0.3432 0.1862 0.4356 0.068 Uiso 1 1 calc R . . 
H27C H 0.3848 0.0589 0.4361 0.068 Uiso 1 1 calc R . . 
C31 C 0.60825(17) 0.1662(3) 0.71339(17) 0.0262(8) Uani 1 1 d . . . 
C32 C 0.5911(2) 0.1131(4) 0.76703(19) 0.0387(10) Uani 1 1 d . . . 
H32A H 0.5584 0.1522 0.7885 0.046 Uiso 1 1 calc R . . 
C33 C 0.6207(2) 0.0032(4) 0.7902(2) 0.0423(10) Uani 1 1 d . . . 
H33A H 0.6083 -0.0311 0.8276 0.051 Uiso 1 1 calc R . . 
C34 C 0.66786(18) -0.0571(3) 0.76018(18) 0.0302(8) Uani 1 1 d . . . 
C35 C 0.68519(18) -0.0034(3) 0.70631(19) 0.0334(9) Uani 1 1 d . . . 
H35A H 0.7178 -0.0429 0.6849 0.040 Uiso 1 1 calc R . . 
C36 C 0.65622(18) 0.1059(3) 0.68302(19) 0.0322(8) Uani 1 1 d . . . 
H36A H 0.6691 0.1405 0.6459 0.039 Uiso 1 1 calc R . . 
C37 C 0.7004(2) -0.1751(3) 0.7860(2) 0.0412(10) Uani 1 1 d . . . 
H37A H 0.7412 -0.1898 0.7669 0.062 Uiso 1 1 calc R . . 
H37B H 0.6702 -0.2460 0.7771 0.062 Uiso 1 1 calc R . . 
H37C H 0.7110 -0.1665 0.8309 0.062 Uiso 1 1 calc R . . 
C41 C 0.63048(18) 0.4279(3) 0.64569(19) 0.0294(8) Uani 1 1 d . . . 
C42 C 0.65196(19) 0.3989(3) 0.58981(19) 0.0350(9) Uani 1 1 d . . . 
H42A H 0.6324 0.3306 0.5665 0.042 Uiso 1 1 calc R . . 
C43 C 0.7018(2) 0.4676(4) 0.56651(19) 0.0400(10) Uani 1 1 d . . . 
H43A H 0.7164 0.4445 0.5280 0.048 Uiso 1 1 calc R . . 
C44 C 0.73047(19) 0.5694(4) 0.5989(2) 0.0393(10) Uani 1 1 d . . . 
C45 C 0.7084(2) 0.5982(4) 0.6546(2) 0.0388(10) Uani 1 1 d . . . 
H45A H 0.7272 0.6677 0.6775 0.047 Uiso 1 1 calc R . . 
C46 C 0.65935(19) 0.5286(3) 0.67882(19) 0.0336(9) Uani 1 1 d . . . 
H46A H 0.6457 0.5500 0.7179 0.040 Uiso 1 1 calc R . . 
C47 C 0.7843(2) 0.6455(5) 0.5745(3) 0.0591(13) Uani 1 1 d . . . 
H47A H 0.8169 0.6702 0.6089 0.089 Uiso 1 1 calc R . . 
H47B H 0.7650 0.7205 0.5537 0.089 Uiso 1 1 calc R . . 
H47C H 0.8061 0.5951 0.5449 0.089 Uiso 1 1 calc R . . 
 
loop_ 
 _atom_site_aniso_label 
 _atom_site_aniso_U_11 
 _atom_site_aniso_U_22 
 _atom_site_aniso_U_33 
 _atom_site_aniso_U_23 
 _atom_site_aniso_U_13 
 _atom_site_aniso_U_12 
Ge1 0.0281(3) 0.0192(3) 0.0340(4) 0.000 0.0127(2) 0.000 
Ge2 0.0264(2) 0.0222(2) 0.0299(3) 0.00053(13) 0.00906(18) 0.00050(13) 
F12 0.0476(14) 0.0377(12) 0.0404(14) -0.0048(10) 0.0074(11) 0.0070(10) 
F13 0.0537(16) 0.0724(18) 0.0430(16) -0.0081(13) 0.0005(13) -0.0020(13) 
F14 0.080(2) 0.0637(17) 0.0459(17) -0.0222(13) 0.0111(14) -0.0276(15) 
F15 0.0760(19) 0.0334(13) 0.068(2) -0.0238(11) 0.0334(16) -0.0088(11) 
F16 0.0459(15) 0.0346(12) 0.0686(19) -0.0123(11) 0.0212(13) 0.0033(10) 
C11 0.035(2) 0.0272(17) 0.035(2) -0.0044(15) 0.0173(17) -0.0056(15) 
C12 0.045(2) 0.0290(18) 0.036(2) -0.0021(16) 0.0211(19) -0.0050(16) 
C13 0.046(3) 0.046(2) 0.032(2) 0.0007(18) 0.014(2) -0.0065(19) 
C14 0.059(3) 0.045(2) 0.038(3) -0.0121(19) 0.018(2) -0.022(2) 
C15 0.056(3) 0.0288(19) 0.050(3) -0.0129(18) 0.030(2) -0.0133(19) 
C16 0.040(2) 0.0281(18) 0.043(2) -0.0052(17) 0.0196(19) -0.0052(16) 
C21 0.0261(18) 0.0286(17) 0.028(2) 0.0016(14) 0.0067(15) 0.0013(14) 
C22 0.035(2) 0.0260(17) 0.041(2) 0.0011(16) 0.0061(18) 0.0013(15) 
C23 0.036(2) 0.035(2) 0.039(3) 0.0101(16) 0.0059(19) 0.0067(15) 
C24 0.0264(19) 0.038(2) 0.037(2) 0.0010(16) 0.0092(17) 0.0013(15) 
C25 0.032(2) 0.0266(17) 0.040(2) -0.0031(16) 0.0122(18) -0.0016(15) 
C26 0.0300(19) 0.0257(17) 0.031(2) 0.0042(15) 0.0091(16) 0.0044(14) 
C27 0.042(2) 0.056(2) 0.037(3) -0.002(2) 0.001(2) -0.003(2) 
C31 0.0262(18) 0.0233(15) 0.030(2) -0.0008(14) 0.0047(15) 0.0012(13) 
C32 0.044(2) 0.036(2) 0.040(2) 0.0064(17) 0.0237(19) 0.0095(17) 
C33 0.049(3) 0.038(2) 0.043(3) 0.0101(18) 0.021(2) 0.0064(18) 
C34 0.032(2) 0.0245(16) 0.033(2) -0.0015(15) 0.0020(16) 0.0000(14) 
C35 0.031(2) 0.0311(18) 0.040(2) -0.0024(16) 0.0108(17) 0.0053(15) 
C36 0.033(2) 0.0308(18) 0.035(2) 0.0015(16) 0.0106(17) 0.0011(15) 
C37 0.046(3) 0.0284(19) 0.049(3) 0.0036(16) 0.009(2) 0.0057(16) 
C41 0.0272(19) 0.0242(16) 0.039(2) 0.0034(14) 0.0118(16) 0.0010(13) 
C42 0.037(2) 0.0362(19) 0.033(2) 0.0016(16) 0.0088(18) -0.0038(16) 
C43 0.036(2) 0.055(2) 0.031(2) 0.0039(18) 0.0137(18) -0.0016(18) 
C44 0.030(2) 0.048(2) 0.042(3) 0.0145(18) 0.0096(18) -0.0025(17) 
C45 0.035(2) 0.0324(19) 0.050(3) 0.0006(17) 0.0111(19) -0.0072(16) 
C46 0.033(2) 0.0349(19) 0.035(2) 0.0014(16) 0.0125(17) -0.0010(16) 
C47 0.042(3) 0.076(3) 0.062(3) 0.017(3) 0.020(2) -0.016(2) 
 
_geom_special_details 
; 
 All esds (except the esd in the dihedral angle between two l.s. planes) 
 are estimated using the full covariance matrix.  The cell esds are taken 
 into account individually in the estimation of esds in distances, angles 
 and torsion angles; correlations between esds in cell parameters are only 
 used when they are defined by crystal symmetry.  An approximate (isotropic) 
 treatment of cell esds is used for estimating esds involving l.s. planes. 
; 
 
loop_ 
 _geom_bond_atom_site_label_1 
 _geom_bond_atom_site_label_2 
 _geom_bond_distance 
 _geom_bond_site_symmetry_2 
 _geom_bond_publ_flag 
Ge1 C11 1.992(4) . ? 
Ge1 C11 1.992(4) 2_656 ? 
Ge1 Ge2 2.4590(5) . ? 
Ge1 Ge2 2.4590(5) 2_656 ? 
Ge2 C31 1.949(3) . ? 
Ge2 C21 1.957(4) . ? 
Ge2 C41 1.961(3) . ? 
F12 C12 1.353(4) . ? 
F13 C13 1.339(5) . ? 
F14 C14 1.338(5) . ? 
F15 C15 1.342(4) . ? 
F16 C16 1.346(5) . ? 
C11 C12 1.369(6) . ? 
C11 C16 1.387(5) . ? 
C12 C13 1.374(6) . ? 
C13 C14 1.373(6) . ? 
C14 C15 1.374(7) . ? 
C15 C16 1.378(6) . ? 
C21 C22 1.394(5) . ? 
C21 C26 1.395(5) . ? 
C22 C23 1.371(6) . ? 
C22 H22A 0.9500 . ? 
C23 C24 1.396(5) . ? 
C23 H23A 0.9500 . ? 
C24 C25 1.390(6) . ? 
C24 C27 1.496(6) . ? 
C25 C26 1.378(5) . ? 
C25 H25A 0.9500 . ? 
C26 H26A 0.9500 . ? 
C27 H27A 0.9800 . ? 
C27 H27B 0.9800 . ? 
C27 H27C 0.9800 . ? 
C31 C32 1.376(5) . ? 
C31 C36 1.394(5) . ? 
C32 C33 1.389(6) . ? 
C32 H32A 0.9500 . ? 
C33 C34 1.378(5) . ? 
C33 H33A 0.9500 . ? 
C34 C35 1.384(5) . ? 
C34 C37 1.503(5) . ? 
C35 C36 1.379(5) . ? 
C35 H35A 0.9500 . ? 
C36 H36A 0.9500 . ? 
C37 H37A 0.9800 . ? 
C37 H37B 0.9800 . ? 
C37 H37C 0.9800 . ? 
C41 C42 1.371(5) . ? 
C41 C46 1.388(5) . ? 
C42 C43 1.391(5) . ? 
C42 H42A 0.9500 . ? 
C43 C44 1.388(6) . ? 
C43 H43A 0.9500 . ? 
C44 C45 1.373(6) . ? 
C44 C47 1.505(5) . ? 
C45 C46 1.393(5) . ? 
C45 H45A 0.9500 . ? 
C46 H46A 0.9500 . ? 
C47 H47A 0.9800 . ? 
C47 H47B 0.9800 . ? 
C47 H47C 0.9800 . ? 
 
loop_ 
 _geom_angle_atom_site_label_1 
 _geom_angle_atom_site_label_2 
 _geom_angle_atom_site_label_3 
 _geom_angle 
 _geom_angle_site_symmetry_1 
 _geom_angle_site_symmetry_3 
 _geom_angle_publ_flag 
C11 Ge1 C11 108.0(2) . 2_656 ? 
C11 Ge1 Ge2 113.34(10) . . ? 
C11 Ge1 Ge2 98.91(10) 2_656 . ? 
C11 Ge1 Ge2 98.91(10) . 2_656 ? 
C11 Ge1 Ge2 113.34(10) 2_656 2_656 ? 
Ge2 Ge1 Ge2 124.10(3) . 2_656 ? 
C31 Ge2 C21 108.17(15) . . ? 
C31 Ge2 C41 110.58(14) . . ? 
C21 Ge2 C41 105.09(16) . . ? 
C31 Ge2 Ge1 112.19(11) . . ? 
C21 Ge2 Ge1 108.51(10) . . ? 
C41 Ge2 Ge1 111.96(10) . . ? 
C12 C11 C16 115.7(4) . . ? 
C12 C11 Ge1 120.8(3) . . ? 
C16 C11 Ge1 123.0(3) . . ? 
F12 C12 C11 119.0(3) . . ? 
F12 C12 C13 117.2(4) . . ? 
C11 C12 C13 123.8(4) . . ? 
F13 C13 C14 119.7(4) . . ? 
F13 C13 C12 121.4(4) . . ? 
C14 C13 C12 118.9(4) . . ? 
F14 C14 C13 120.9(5) . . ? 
F14 C14 C15 119.5(4) . . ? 
C13 C14 C15 119.5(4) . . ? 
F15 C15 C14 119.9(4) . . ? 
F15 C15 C16 120.2(4) . . ? 
C14 C15 C16 119.9(4) . . ? 
F16 C16 C15 117.7(3) . . ? 
F16 C16 C11 120.2(4) . . ? 
C15 C16 C11 122.2(4) . . ? 
C22 C21 C26 117.2(4) . . ? 
C22 C21 Ge2 122.0(3) . . ? 
C26 C21 Ge2 120.7(3) . . ? 
C23 C22 C21 121.7(3) . . ? 
C23 C22 H22A 119.2 . . ? 
C21 C22 H22A 119.2 . . ? 
C22 C23 C24 121.1(4) . . ? 
C22 C23 H23A 119.4 . . ? 
C24 C23 H23A 119.4 . . ? 
C25 C24 C23 117.4(4) . . ? 
C25 C24 C27 121.1(3) . . ? 
C23 C24 C27 121.5(4) . . ? 
C26 C25 C24 121.5(3) . . ? 
C26 C25 H25A 119.3 . . ? 
C24 C25 H25A 119.3 . . ? 
C25 C26 C21 121.1(3) . . ? 
C25 C26 H26A 119.4 . . ? 
C21 C26 H26A 119.4 . . ? 
C24 C27 H27A 109.5 . . ? 
C24 C27 H27B 109.5 . . ? 
H27A C27 H27B 109.5 . . ? 
C24 C27 H27C 109.5 . . ? 
H27A C27 H27C 109.5 . . ? 
H27B C27 H27C 109.5 . . ? 
C32 C31 C36 117.8(3) . . ? 
C32 C31 Ge2 122.4(3) . . ? 
C36 C31 Ge2 119.7(3) . . ? 
C31 C32 C33 121.0(3) . . ? 
C31 C32 H32A 119.5 . . ? 
C33 C32 H32A 119.5 . . ? 
C34 C33 C32 121.3(4) . . ? 
C34 C33 H33A 119.3 . . ? 
C32 C33 H33A 119.3 . . ? 
C33 C34 C35 117.6(3) . . ? 
C33 C34 C37 121.0(4) . . ? 
C35 C34 C37 121.4(3) . . ? 
C36 C35 C34 121.6(3) . . ? 
C36 C35 H35A 119.2 . . ? 
C34 C35 H35A 119.2 . . ? 
C35 C36 C31 120.7(3) . . ? 
C35 C36 H36A 119.7 . . ? 
C31 C36 H36A 119.7 . . ? 
C34 C37 H37A 109.5 . . ? 
C34 C37 H37B 109.5 . . ? 
H37A C37 H37B 109.5 . . ? 
C34 C37 H37C 109.5 . . ? 
H37A C37 H37C 109.5 . . ? 
H37B C37 H37C 109.5 . . ? 
C42 C41 C46 118.5(3) . . ? 
C42 C41 Ge2 117.8(3) . . ? 
C46 C41 Ge2 123.5(3) . . ? 
C41 C42 C43 121.3(4) . . ? 
C41 C42 H42A 119.4 . . ? 
C43 C42 H42A 119.4 . . ? 
C44 C43 C42 120.7(4) . . ? 
C44 C43 H43A 119.6 . . ? 
C42 C43 H43A 119.6 . . ? 
C45 C44 C43 117.6(3) . . ? 
C45 C44 C47 120.7(4) . . ? 
C43 C44 C47 121.7(4) . . ? 
C44 C45 C46 122.1(4) . . ? 
C44 C45 H45A 119.0 . . ? 
C46 C45 H45A 119.0 . . ? 
C41 C46 C45 119.8(4) . . ? 
C41 C46 H46A 120.1 . . ? 
C45 C46 H46A 120.1 . . ? 
C44 C47 H47A 109.5 . . ? 
C44 C47 H47B 109.5 . . ? 
H47A C47 H47B 109.5 . . ? 
C44 C47 H47C 109.5 . . ? 
H47A C47 H47C 109.5 . . ? 
H47B C47 H47C 109.5 . . ? 
 
_diffrn_measured_fraction_theta_max    0.996 
_diffrn_reflns_theta_full              25.50 
_diffrn_measured_fraction_theta_full   0.996 
_refine_diff_density_max    1.154 
_refine_diff_density_min   -0.886 
_refine_diff_density_rms    0.116 

#===END

data_7 

_iucr_refine_instructions_details
;
TITL z in R-3
CELL 0.71073  39.5809  39.5809   5.9385  90.000  90.000 120.000
ZERR   18.00   0.0021   0.0021   0.0006   0.000   0.000   0.000
LATT  3
SYMM -Y, X-Y, Z
SYMM -X+Y, -X, Z
SFAC C H F GE
UNIT 324 18 270 18
TEMP -93
SIZE .15 .15 .02
 
L.S. 10
BOND $H
ACTA
FMAP 2
PLAN 6
OMIT -2 52
OMIT -1 2 0
OMIT 0 3 0
 
WGHT    0.050500
FVAR       0.01883
GE1   4    0.462500    0.148244   -0.009167    11.00000    0.01901    0.01832 =
         0.01826    0.00087    0.00034    0.00850
H1    2    0.463713    0.149915   -0.233156    11.00000    0.03013
C11   1    0.437616    0.094134    0.086482    11.00000    0.01702    0.02191 =
         0.01989    0.00197   -0.00298    0.00955
C12   1    0.438130    0.066541   -0.053363    11.00000    0.01764    0.02730 =
         0.02204    0.00107    0.00053    0.01095
C13   1    0.417453    0.027113   -0.009056    11.00000    0.03019    0.02480 =
         0.02554   -0.00254   -0.00199    0.01715
C14   1    0.396208    0.014591    0.187433    11.00000    0.02025    0.01981 =
         0.03230    0.00325   -0.00197    0.00696
C15   1    0.395581    0.041105    0.333378    11.00000    0.02011    0.03081 =
         0.02180    0.00682    0.00173    0.01006
C16   1    0.416124    0.080182    0.281657    11.00000    0.01906    0.02576 =
         0.02266   -0.00345   -0.00462    0.01009
C21   1    0.516458    0.176595    0.092570    11.00000    0.02155    0.01961 =
         0.02037   -0.00145   -0.00058    0.01018
C22   1    0.544599    0.205156   -0.042100    11.00000    0.02383    0.02477 =
         0.02341    0.00306    0.00085    0.01324
C23   1    0.583515    0.224785    0.011356    11.00000    0.02280    0.02435 =
         0.03216    0.00113    0.00603    0.01191
C24   1    0.595097    0.216196    0.210909    11.00000    0.01919    0.02965 =
         0.03732   -0.00759   -0.00288    0.01404
C25   1    0.568051    0.188288    0.352609    11.00000    0.03365    0.03079 =
         0.02213   -0.00723   -0.00491    0.02206
C26   1    0.529473    0.168926    0.291239    11.00000    0.02550    0.02200 =
         0.02215    0.00025    0.00423    0.01188
C31   1    0.433245    0.172697    0.096771    11.00000    0.02015    0.01863 =
         0.02513    0.00358    0.00190    0.00822
C32   1    0.440434    0.192886    0.295702    11.00000    0.02787    0.02020 =
         0.02214    0.00355   -0.00066    0.01061
C33   1    0.419765    0.210851    0.361679    11.00000    0.03961    0.02366 =
         0.02584    0.00176    0.00970    0.01579
C34   1    0.391001    0.208914    0.223864    11.00000    0.02913    0.02552 =
         0.04377    0.00598    0.01206    0.01822
C35   1    0.382989    0.189198    0.023578    11.00000    0.02540    0.02894 =
         0.03444    0.00611    0.00061    0.01504
C36   1    0.404026    0.171431   -0.035132    11.00000    0.02248    0.02261 =
         0.02515    0.00384    0.00193    0.00735
F12   3    0.458663    0.077984   -0.246703    11.00000    0.03680    0.02806 =
         0.02525    0.00186    0.01205    0.01536
F13   3    0.418375    0.001467   -0.150366    11.00000    0.04845    0.02417 =
         0.03914   -0.00438    0.00717    0.01755
F14   3    0.377081   -0.023213    0.238742    11.00000    0.04325    0.01757 =
         0.04429    0.00807    0.00664    0.00681
F15   3    0.374631    0.028499    0.524104    11.00000    0.03625    0.03593 =
         0.02646    0.00962    0.01241    0.01148
F16   3    0.414351    0.105304    0.428685    11.00000    0.03659    0.02807 =
         0.02362   -0.00389    0.00461    0.01403
F22   3    0.533810    0.214686   -0.236616    11.00000    0.02865    0.03205 =
         0.02867    0.01056    0.00035    0.01191
F23   3    0.609722    0.251803   -0.125261    11.00000    0.02184    0.03769 =
         0.05268    0.01294    0.00993    0.00565
F24   3    0.632528    0.235609    0.270091    11.00000    0.02090    0.04650 =
         0.05185   -0.00884   -0.00956    0.01338
F25   3    0.579746    0.180319    0.547517    11.00000    0.04149    0.04977 =
         0.02690   -0.00454   -0.01021    0.02891
F26   3    0.503914    0.141189    0.432105    11.00000    0.03236    0.03452 =
         0.02278    0.00856    0.00358    0.01418
F32   3    0.468674    0.195945    0.435097    11.00000    0.03474    0.03521 =
         0.02538   -0.00240   -0.00594    0.01902
F33   3    0.427878    0.230633    0.556750    11.00000    0.05703    0.03507 =
         0.03106   -0.00428    0.00799    0.02490
F34   3    0.370813    0.226287    0.285376    11.00000    0.05191    0.04881 =
         0.05780    0.00403    0.01296    0.04004
F35   3    0.354983    0.187361   -0.110548    11.00000    0.03881    0.05845 =
         0.05438    0.00015   -0.00827    0.03494
F36   3    0.394990    0.152004   -0.233079    11.00000    0.03276    0.03641 =
         0.03247   -0.00832   -0.00930    0.01936
HKLF 4
 
REM  z in R-3
REM R1 =  0.0382 for   2552 Fo > 4sig(Fo)  and  0.0647 for all   3527 data
REM    311 parameters refined using      0 restraints
 
END  
     
WGHT      0.0506      0.0000 
REM Highest difference peak  0.749,  deepest hole -0.290,  1-sigma level  0.083
Q1    1   0.6667  0.3333  0.2242  10.33333  0.05    0.75
Q2    1   0.4896  0.1634  0.0854  11.00000  0.05    0.43
Q3    1   0.4569  0.1558  0.1505  11.00000  0.05    0.43
Q4    1   0.4521  0.1167  0.0469  11.00000  0.05    0.42
Q5    1   0.4540  0.1420 -0.1628  11.00000  0.05    0.38
Q6    1   0.4424  0.1551 -0.0346  11.00000  0.05    0.37

;
 
_audit_creation_method            SHELXL-97 
_chemical_name_systematic 
; 
 ? 
; 
_chemical_name_common             ? 
_chemical_melting_point           ? 
_chemical_formula_moiety          'C18 H F15 Ge'
_chemical_formula_sum 
 'C18 H F15 Ge' 
_chemical_formula_weight          574.78 
 
loop_ 
 _atom_type_symbol 
 _atom_type_description 
 _atom_type_scat_dispersion_real 
 _atom_type_scat_dispersion_imag 
 _atom_type_scat_source 
 'C'  'C'   0.0033   0.0016 
 'International Tables Vol C Tables 4.2.6.8 and 6.1.1.4' 
 'H'  'H'   0.0000   0.0000 
 'International Tables Vol C Tables 4.2.6.8 and 6.1.1.4' 
 'F'  'F'   0.0171   0.0103 
 'International Tables Vol C Tables 4.2.6.8 and 6.1.1.4' 
 'Ge'  'Ge'   0.1547   1.8001 
 'International Tables Vol C Tables 4.2.6.8 and 6.1.1.4' 
 
_symmetry_cell_setting            trigonal
_symmetry_space_group_name_H-M    'R -3'
_symmetry_space_group_name_Hall   '-R 3'
 
loop_ 
 _symmetry_equiv_pos_as_xyz 
 'x, y, z' 
 '-y, x-y, z' 
 '-x+y, -x, z' 
 'x+2/3, y+1/3, z+1/3' 
 '-y+2/3, x-y+1/3, z+1/3' 
 '-x+y+2/3, -x+1/3, z+1/3' 
 'x+1/3, y+2/3, z+2/3' 
 '-y+1/3, x-y+2/3, z+2/3' 
 '-x+y+1/3, -x+2/3, z+2/3' 
 '-x, -y, -z' 
 'y, -x+y, -z' 
 'x-y, x, -z' 
 '-x+2/3, -y+1/3, -z+1/3' 
 'y+2/3, -x+y+1/3, -z+1/3' 
 'x-y+2/3, x+1/3, -z+1/3' 
 '-x+1/3, -y+2/3, -z+2/3' 
 'y+1/3, -x+y+2/3, -z+2/3' 
 'x-y+1/3, x+2/3, -z+2/3' 
 
_cell_length_a                    39.581(2) 
_cell_length_b                    39.581(2) 
_cell_length_c                    5.9385(6) 
_cell_angle_alpha                 90.00 
_cell_angle_beta                  90.00 
_cell_angle_gamma                 120.00 
_cell_volume                      8057.1(10) 
_cell_formula_units_Z             18 
_cell_measurement_temperature     180(2) 
_cell_measurement_reflns_used     3437
_cell_measurement_theta_min       2.723
_cell_measurement_theta_max       30.998
 
_exptl_crystal_description        plate
_exptl_crystal_colour             colourless
_exptl_crystal_size_max           0.15 
_exptl_crystal_size_mid           0.15 
_exptl_crystal_size_min           0.02 
_exptl_crystal_density_meas       ? 
_exptl_crystal_density_diffrn     2.132 
_exptl_crystal_density_method     'not measured' 
_exptl_crystal_F_000              4968 
_exptl_absorpt_coefficient_mu     1.868 
_exptl_absorpt_correction_type    multi-scan
_exptl_absorpt_correction_T_min   0.7670 
_exptl_absorpt_correction_T_max   0.9636 
_exptl_absorpt_process_details    'SADABS (Bruker 2008)'
 
_exptl_special_details 
; 
 ? 
; 
 
_diffrn_ambient_temperature       180(2) 
_diffrn_radiation_wavelength      0.71073 
_diffrn_radiation_type            MoK\a 
_diffrn_radiation_source          'fine-focus sealed tube' 
_diffrn_radiation_monochromator   graphite 
_diffrn_measurement_device_type   'Bruker SMART APEX II'
_diffrn_measurement_method        \w
_diffrn_detector_area_resol_mean  ? 
_diffrn_standards_number          0
_diffrn_standards_interval_count  ? 
_diffrn_standards_interval_time   0
_diffrn_standards_decay_%         0
_diffrn_reflns_number             20923 
_diffrn_reflns_av_R_equivalents   0.0671 
_diffrn_reflns_av_sigmaI/netI     0.0478 
_diffrn_reflns_limit_h_min        -48 
_diffrn_reflns_limit_h_max        48 
_diffrn_reflns_limit_k_min        -48 
_diffrn_reflns_limit_k_max        48 
_diffrn_reflns_limit_l_min        -7 
_diffrn_reflns_limit_l_max        7 
_diffrn_reflns_theta_min          2.06 
_diffrn_reflns_theta_max          26.00 
_reflns_number_total              3527 
_reflns_number_gt                 2552 
_reflns_threshold_expression      I>2\s(I) 
 
_computing_data_collection        '<i>APEX2</i> (Bruker, 2008)'
_computing_cell_refinement        'SAINT (Bruker, 2008)'
_computing_data_reduction         'SAINT (Bruker, 2008)'
_computing_structure_solution     'SHELXTL (Sheldrick, 2008)' 
_computing_structure_refinement   'SHELXTL (Sheldrick, 2008)'
_computing_molecular_graphics     'SHELXTL (Sheldrick, 2008)'
_computing_publication_material   'SHELXTL (Sheldrick, 2008)'
 
_refine_special_details 
; 
 Refinement of F^2^ against ALL reflections.  The weighted R-factor wR and 
 goodness of fit S are based on F^2^, conventional R-factors R are based 
 on F, with F set to zero for negative F^2^. The threshold expression of 
 F^2^ > 2sigma(F^2^) is used only for calculating R-factors(gt) etc. and is 
 not relevant to the choice of reflections for refinement.  R-factors based 
 on F^2^ are statistically about twice as large as those based on F, and R- 
 factors based on ALL data will be even larger. 
; 
 
_refine_ls_structure_factor_coef  Fsqd  
_refine_ls_matrix_type            full 
_refine_ls_weighting_scheme       calc  
_refine_ls_weighting_details 
 'calc w=1/[\s^2^(Fo^2^)+(0.0505P)^2^+0.0000P] where P=(Fo^2^+2Fc^2^)/3' 
_atom_sites_solution_primary      direct 
_atom_sites_solution_secondary    difmap 
_atom_sites_solution_hydrogens    difmap
_refine_ls_hydrogen_treatment     refall
_refine_ls_extinction_method      none 
_refine_ls_extinction_coef        ? 
_refine_ls_number_reflns          3527 
_refine_ls_number_parameters      311 
_refine_ls_number_restraints      0 
_refine_ls_R_factor_all           0.0647 
_refine_ls_R_factor_gt            0.0382 
_refine_ls_wR_factor_ref          0.0934 
_refine_ls_wR_factor_gt           0.0854 
_refine_ls_goodness_of_fit_ref    1.000 
_refine_ls_restrained_S_all       1.000 
_refine_ls_shift/su_max           0.001 
_refine_ls_shift/su_mean          0.000 
 
loop_ 
 _atom_site_label 
 _atom_site_type_symbol 
 _atom_site_fract_x 
 _atom_site_fract_y 
 _atom_site_fract_z 
 _atom_site_U_iso_or_equiv 
 _atom_site_adp_type 
 _atom_site_occupancy 
 _atom_site_symmetry_multiplicity 
 _atom_site_calc_flag 
 _atom_site_refinement_flags 
 _atom_site_disorder_assembly 
 _atom_site_disorder_group 
Ge1 Ge 0.462500(10) 0.148244(10) -0.00917(6) 0.01890(12) Uani 1 1 d . . . 
H1 H 0.4637(9) 0.1499(9) -0.233(6) 0.030(10) Uiso 1 1 d . . . 
C11 C 0.43762(9) 0.09413(9) 0.0865(5) 0.0197(7) Uani 1 1 d . . . 
C12 C 0.43813(9) 0.06654(10) -0.0534(6) 0.0225(7) Uani 1 1 d . . . 
C13 C 0.41745(10) 0.02711(10) -0.0091(6) 0.0253(8) Uani 1 1 d . . . 
C14 C 0.39621(10) 0.01459(10) 0.1874(6) 0.0255(8) Uani 1 1 d . . . 
C15 C 0.39558(10) 0.04110(10) 0.3334(6) 0.0254(8) Uani 1 1 d . . . 
C16 C 0.41612(10) 0.08018(10) 0.2817(5) 0.0230(8) Uani 1 1 d . . . 
C21 C 0.51646(10) 0.17660(9) 0.0926(5) 0.0206(7) Uani 1 1 d . . . 
C22 C 0.54460(10) 0.20516(10) -0.0421(6) 0.0235(8) Uani 1 1 d . . . 
C23 C 0.58351(10) 0.22479(10) 0.0114(6) 0.0264(8) Uani 1 1 d . . . 
C24 C 0.59510(10) 0.21620(11) 0.2109(6) 0.0279(8) Uani 1 1 d . . . 
C25 C 0.56805(11) 0.18829(10) 0.3526(6) 0.0262(8) Uani 1 1 d . . . 
C26 C 0.52947(10) 0.16893(10) 0.2912(6) 0.0232(8) Uani 1 1 d . . . 
C31 C 0.43324(9) 0.17270(9) 0.0968(6) 0.0220(8) Uani 1 1 d . . . 
C32 C 0.44043(10) 0.19289(10) 0.2957(6) 0.0240(8) Uani 1 1 d . . . 
C33 C 0.41976(11) 0.21085(10) 0.3617(6) 0.0297(9) Uani 1 1 d . . . 
C34 C 0.39100(10) 0.20891(10) 0.2239(7) 0.0308(9) Uani 1 1 d . . . 
C35 C 0.38299(10) 0.18920(10) 0.0236(6) 0.0289(8) Uani 1 1 d . . . 
C36 C 0.40403(10) 0.17143(10) -0.0351(6) 0.0252(8) Uani 1 1 d . . . 
F12 F 0.45866(6) 0.07798(6) -0.2467(3) 0.0304(5) Uani 1 1 d . . . 
F13 F 0.41838(6) 0.00147(6) -0.1504(3) 0.0375(5) Uani 1 1 d . . . 
F14 F 0.37708(6) -0.02321(6) 0.2387(4) 0.0388(5) Uani 1 1 d . . . 
F15 F 0.37463(6) 0.02850(6) 0.5241(3) 0.0358(5) Uani 1 1 d . . . 
F16 F 0.41435(6) 0.10530(6) 0.4287(3) 0.0304(5) Uani 1 1 d . . . 
F22 F 0.53381(6) 0.21469(6) -0.2366(3) 0.0312(5) Uani 1 1 d . . . 
F23 F 0.60972(6) 0.25180(6) -0.1253(4) 0.0415(6) Uani 1 1 d . . . 
F24 F 0.63253(6) 0.23561(6) 0.2701(4) 0.0413(6) Uani 1 1 d . . . 
F25 F 0.57975(6) 0.18032(6) 0.5475(3) 0.0367(5) Uani 1 1 d . . . 
F26 F 0.50391(6) 0.14119(6) 0.4321(3) 0.0310(5) Uani 1 1 d . . . 
F32 F 0.46867(6) 0.19595(6) 0.4351(3) 0.0311(5) Uani 1 1 d . . . 
F33 F 0.42788(7) 0.23063(6) 0.5567(3) 0.0402(6) Uani 1 1 d . . . 
F34 F 0.37081(7) 0.22629(7) 0.2854(4) 0.0462(6) Uani 1 1 d . . . 
F35 F 0.35498(6) 0.18736(7) -0.1105(4) 0.0458(6) Uani 1 1 d . . . 
F36 F 0.39499(6) 0.15200(6) -0.2331(3) 0.0330(5) Uani 1 1 d . . . 
 
loop_ 
 _atom_site_aniso_label 
 _atom_site_aniso_U_11 
 _atom_site_aniso_U_22 
 _atom_site_aniso_U_33 
 _atom_site_aniso_U_23 
 _atom_site_aniso_U_13 
 _atom_site_aniso_U_12 
Ge1 0.0190(2) 0.0183(2) 0.01826(19) 0.00087(15) 0.00034(15) 0.00850(16) 
C11 0.0170(17) 0.0219(18) 0.0199(17) 0.0020(14) -0.0030(14) 0.0096(15) 
C12 0.0176(17) 0.0273(19) 0.0220(17) 0.0011(15) 0.0005(14) 0.0110(16) 
C13 0.030(2) 0.0248(19) 0.0255(19) -0.0025(16) -0.0020(16) 0.0172(17) 
C14 0.0203(18) 0.0198(18) 0.032(2) 0.0033(16) -0.0020(16) 0.0070(16) 
C15 0.0201(19) 0.031(2) 0.0218(18) 0.0068(16) 0.0017(15) 0.0101(16) 
C16 0.0191(18) 0.0258(19) 0.0227(18) -0.0034(16) -0.0046(15) 0.0101(16) 
C21 0.0215(18) 0.0196(18) 0.0204(17) -0.0014(14) -0.0006(14) 0.0102(15) 
C22 0.0238(19) 0.0248(19) 0.0234(18) 0.0031(15) 0.0008(15) 0.0132(16) 
C23 0.0228(19) 0.024(2) 0.032(2) 0.0011(16) 0.0060(16) 0.0119(17) 
C24 0.0192(19) 0.030(2) 0.037(2) -0.0076(17) -0.0029(16) 0.0140(17) 
C25 0.034(2) 0.031(2) 0.0221(18) -0.0072(16) -0.0049(16) 0.0221(18) 
C26 0.026(2) 0.0220(18) 0.0222(18) 0.0002(15) 0.0042(15) 0.0119(16) 
C31 0.0202(18) 0.0186(18) 0.0251(18) 0.0036(15) 0.0019(15) 0.0082(15) 
C32 0.028(2) 0.0202(18) 0.0221(18) 0.0035(15) -0.0007(15) 0.0106(16) 
C33 0.040(2) 0.024(2) 0.0258(19) 0.0018(16) 0.0097(18) 0.0158(18) 
C34 0.029(2) 0.026(2) 0.044(2) 0.0060(18) 0.0121(18) 0.0182(18) 
C35 0.025(2) 0.029(2) 0.034(2) 0.0061(17) 0.0006(17) 0.0150(17) 
C36 0.0225(19) 0.0226(19) 0.0251(19) 0.0038(15) 0.0019(16) 0.0073(16) 
F12 0.0368(12) 0.0281(11) 0.0252(11) 0.0019(9) 0.0120(9) 0.0154(10) 
F13 0.0485(14) 0.0242(12) 0.0391(13) -0.0044(10) 0.0072(11) 0.0176(11) 
F14 0.0433(13) 0.0176(11) 0.0443(13) 0.0081(10) 0.0066(11) 0.0068(10) 
F15 0.0362(13) 0.0359(12) 0.0265(11) 0.0096(9) 0.0124(10) 0.0115(10) 
F16 0.0366(12) 0.0281(11) 0.0236(10) -0.0039(9) 0.0046(9) 0.0140(10) 
F22 0.0287(11) 0.0320(12) 0.0287(11) 0.0106(9) 0.0004(9) 0.0119(10) 
F23 0.0218(11) 0.0377(13) 0.0527(14) 0.0129(11) 0.0099(10) 0.0057(10) 
F24 0.0209(11) 0.0465(14) 0.0518(14) -0.0088(11) -0.0096(10) 0.0134(11) 
F25 0.0415(13) 0.0498(14) 0.0269(12) -0.0045(10) -0.0102(10) 0.0289(12) 
F26 0.0324(12) 0.0345(12) 0.0228(10) 0.0086(9) 0.0036(9) 0.0142(10) 
F32 0.0347(12) 0.0352(12) 0.0254(11) -0.0024(9) -0.0059(9) 0.0190(10) 
F33 0.0570(15) 0.0351(13) 0.0311(12) -0.0043(10) 0.0080(11) 0.0249(12) 
F34 0.0519(15) 0.0488(15) 0.0578(16) 0.0040(12) 0.0130(12) 0.0400(13) 
F35 0.0388(14) 0.0585(16) 0.0544(15) 0.0001(12) -0.0083(11) 0.0349(13) 
F36 0.0328(12) 0.0364(12) 0.0325(12) -0.0083(10) -0.0093(10) 0.0194(10) 
 
_geom_special_details 
; 
 All esds (except the esd in the dihedral angle between two l.s. planes) 
 are estimated using the full covariance matrix.  The cell esds are taken 
 into account individually in the estimation of esds in distances, angles 
 and torsion angles; correlations between esds in cell parameters are only 
 used when they are defined by crystal symmetry.  An approximate (isotropic) 
 treatment of cell esds is used for estimating esds involving l.s. planes. 
; 
 
loop_ 
 _geom_bond_atom_site_label_1 
 _geom_bond_atom_site_label_2 
 _geom_bond_distance 
 _geom_bond_site_symmetry_2 
 _geom_bond_publ_flag 
Ge1 C11 1.942(3) . ? 
Ge1 C21 1.947(3) . ? 
Ge1 C31 1.948(3) . ? 
Ge1 H1 1.33(3) . ? 
C11 C16 1.379(4) . ? 
C11 C12 1.380(5) . ? 
C12 F12 1.348(4) . ? 
C12 C13 1.377(5) . ? 
C13 F13 1.332(4) . ? 
C13 C14 1.378(5) . ? 
C14 F14 1.331(4) . ? 
C14 C15 1.371(5) . ? 
C15 F15 1.344(4) . ? 
C15 C16 1.375(5) . ? 
C16 F16 1.351(4) . ? 
C21 C22 1.378(5) . ? 
C21 C26 1.381(5) . ? 
C22 F22 1.349(4) . ? 
C22 C23 1.371(5) . ? 
C23 F23 1.330(4) . ? 
C23 C24 1.373(5) . ? 
C24 F24 1.331(4) . ? 
C24 C25 1.375(5) . ? 
C25 F25 1.341(4) . ? 
C25 C26 1.372(5) . ? 
C26 F26 1.348(4) . ? 
C31 C32 1.374(5) . ? 
C31 C36 1.377(5) . ? 
C32 F32 1.347(4) . ? 
C32 C33 1.382(5) . ? 
C33 F33 1.344(4) . ? 
C33 C34 1.373(5) . ? 
C34 F34 1.340(4) . ? 
C34 C35 1.370(5) . ? 
C35 F35 1.337(4) . ? 
C35 C36 1.377(5) . ? 
C36 F36 1.351(4) . ? 
 
loop_ 
 _geom_angle_atom_site_label_1 
 _geom_angle_atom_site_label_2 
 _geom_angle_atom_site_label_3 
 _geom_angle 
 _geom_angle_site_symmetry_1 
 _geom_angle_site_symmetry_3 
 _geom_angle_publ_flag 
C11 Ge1 C21 110.51(13) . . ? 
C11 Ge1 C31 110.73(13) . . ? 
C21 Ge1 C31 111.52(14) . . ? 
C11 Ge1 H1 109.4(14) . . ? 
C21 Ge1 H1 106.2(14) . . ? 
C31 Ge1 H1 108.3(14) . . ? 
C16 C11 C12 116.0(3) . . ? 
C16 C11 Ge1 124.0(3) . . ? 
C12 C11 Ge1 119.8(2) . . ? 
F12 C12 C13 117.4(3) . . ? 
F12 C12 C11 119.5(3) . . ? 
C13 C12 C11 123.1(3) . . ? 
F13 C13 C14 120.3(3) . . ? 
F13 C13 C12 121.1(3) . . ? 
C14 C13 C12 118.7(3) . . ? 
F14 C14 C15 119.9(3) . . ? 
F14 C14 C13 120.0(3) . . ? 
C15 C14 C13 120.1(3) . . ? 
F15 C15 C14 119.5(3) . . ? 
F15 C15 C16 120.9(3) . . ? 
C14 C15 C16 119.5(3) . . ? 
F16 C16 C15 117.7(3) . . ? 
F16 C16 C11 119.8(3) . . ? 
C15 C16 C11 122.5(3) . . ? 
C22 C21 C26 116.0(3) . . ? 
C22 C21 Ge1 119.8(2) . . ? 
C26 C21 Ge1 124.1(3) . . ? 
F22 C22 C23 117.6(3) . . ? 
F22 C22 C21 119.2(3) . . ? 
C23 C22 C21 123.3(3) . . ? 
F23 C23 C22 121.2(3) . . ? 
F23 C23 C24 120.2(3) . . ? 
C22 C23 C24 118.6(3) . . ? 
F24 C24 C23 119.9(3) . . ? 
F24 C24 C25 119.8(3) . . ? 
C23 C24 C25 120.3(3) . . ? 
F25 C25 C26 121.1(3) . . ? 
F25 C25 C24 119.7(3) . . ? 
C26 C25 C24 119.2(3) . . ? 
F26 C26 C25 117.5(3) . . ? 
F26 C26 C21 119.9(3) . . ? 
C25 C26 C21 122.5(3) . . ? 
C32 C31 C36 115.9(3) . . ? 
C32 C31 Ge1 124.4(3) . . ? 
C36 C31 Ge1 119.7(3) . . ? 
F32 C32 C31 120.1(3) . . ? 
F32 C32 C33 117.2(3) . . ? 
C31 C32 C33 122.6(3) . . ? 
F33 C33 C34 119.8(3) . . ? 
F33 C33 C32 120.9(3) . . ? 
C34 C33 C32 119.3(3) . . ? 
F34 C34 C35 120.1(3) . . ? 
F34 C34 C33 120.0(3) . . ? 
C35 C34 C33 119.9(3) . . ? 
F35 C35 C34 119.8(3) . . ? 
F35 C35 C36 121.2(3) . . ? 
C34 C35 C36 118.9(3) . . ? 
F36 C36 C35 117.1(3) . . ? 
F36 C36 C31 119.6(3) . . ? 
C35 C36 C31 123.3(3) . . ? 
 
_diffrn_measured_fraction_theta_max    0.999 
_diffrn_reflns_theta_full              26.00 
_diffrn_measured_fraction_theta_full   0.999 
_refine_diff_density_max    0.749 
_refine_diff_density_min   -0.290 
_refine_diff_density_rms    0.083 

#===END

data_9 
 
_audit_creation_method            SHELXL-97 
_chemical_name_systematic 
; 
 ? 
; 
_chemical_name_common             ? 
_chemical_melting_point           ? 
_chemical_formula_moiety          'C36 H15 F15 Ge2'
_chemical_formula_sum 
 'C36 H15 F15 Ge2' 
_chemical_formula_weight          877.66 
 
loop_ 
 _atom_type_symbol 
 _atom_type_description 
 _atom_type_scat_dispersion_real 
 _atom_type_scat_dispersion_imag 
 _atom_type_scat_source 
 'C'  'C'   0.0033   0.0016 
 'International Tables Vol C Tables 4.2.6.8 and 6.1.1.4' 
 'H'  'H'   0.0000   0.0000 
 'International Tables Vol C Tables 4.2.6.8 and 6.1.1.4' 
 'F'  'F'   0.0171   0.0103 
 'International Tables Vol C Tables 4.2.6.8 and 6.1.1.4' 
 'Ge'  'Ge'   0.1547   1.8001 
 'International Tables Vol C Tables 4.2.6.8 and 6.1.1.4' 
 
_symmetry_cell_setting            monoclinic
_symmetry_space_group_name_H-M    'C 2/c'
_symmetry_space_group_name_Hall   '-C 2yc'
 
loop_ 
 _symmetry_equiv_pos_as_xyz 
 'x, y, z' 
 '-x, y, -z+1/2' 
 'x+1/2, y+1/2, z' 
 '-x+1/2, y+1/2, -z+1/2' 
 '-x, -y, -z' 
 'x, -y, z-1/2' 
 '-x+1/2, -y+1/2, -z' 
 'x+1/2, -y+1/2, z-1/2' 
 
_cell_length_a                    33.363(3) 
_cell_length_b                    8.3496(8) 
_cell_length_c                    23.688(2) 
_cell_angle_alpha                 90.00 
_cell_angle_beta                  105.248(2) 
_cell_angle_gamma                 90.00 
_cell_volume                      6366.3(11) 
_cell_formula_units_Z             8 
_cell_measurement_temperature     173(2) 
_cell_measurement_reflns_used     9741
_cell_measurement_theta_min       2.442
_cell_measurement_theta_max       29.811
 
_exptl_crystal_description        plate
_exptl_crystal_colour             colourless
_exptl_crystal_size_max           0.30 
_exptl_crystal_size_mid           0.20 
_exptl_crystal_size_min           0.06 
_exptl_crystal_density_meas       ? 
_exptl_crystal_density_diffrn     1.831 
_exptl_crystal_density_method     'not measured' 
_exptl_crystal_F_000              3440 
_exptl_absorpt_coefficient_mu     2.005 
_exptl_absorpt_correction_type    multi-scan
_exptl_absorpt_correction_T_min   0.5845 
_exptl_absorpt_correction_T_max   0.8892 
_exptl_absorpt_process_details    'SADABS (Bruker, 2004)'
 
_exptl_special_details 
; 
 ? 
; 
 
_diffrn_ambient_temperature       173(2) 
_diffrn_radiation_wavelength      0.71073 
_diffrn_radiation_type            MoK\a 
_diffrn_radiation_source          'fine-focus sealed tube' 
_diffrn_radiation_monochromator   graphite 
_diffrn_measurement_device_type   'Bruker SMART APEX II'
_diffrn_measurement_method        \w
_diffrn_detector_area_resol_mean  ? 
_diffrn_standards_number          0
_diffrn_standards_interval_count  ?
_diffrn_standards_interval_time   0
_diffrn_standards_decay_%         0 
_diffrn_reflns_number             31719 
_diffrn_reflns_av_R_equivalents   0.0292 
_diffrn_reflns_av_sigmaI/netI     0.0259 
_diffrn_reflns_limit_h_min        -44 
_diffrn_reflns_limit_h_max        44 
_diffrn_reflns_limit_k_min        -11 
_diffrn_reflns_limit_k_max        11 
_diffrn_reflns_limit_l_min        -31 
_diffrn_reflns_limit_l_max        31 
_diffrn_reflns_theta_min          2.44 
_diffrn_reflns_theta_max          28.00 
_reflns_number_total              7682 
_reflns_number_gt                 6401 
_reflns_threshold_expression      I>2\s(I) 
 
_computing_data_collection        ? 
_computing_cell_refinement        ? 
_computing_data_reduction         ? 
_computing_structure_solution     'SHELXS-97 (Sheldrick, 1990)' 
_computing_structure_refinement   'SHELXL-97 (Sheldrick, 1997)' 
_computing_molecular_graphics     ? 
_computing_publication_material   ? 
 
_refine_special_details 
; 
 Refinement of F^2^ against ALL reflections.  The weighted R-factor wR and 
 goodness of fit S are based on F^2^, conventional R-factors R are based 
 on F, with F set to zero for negative F^2^. The threshold expression of 
 F^2^ > 2sigma(F^2^) is used only for calculating R-factors(gt) etc. and is 
 not relevant to the choice of reflections for refinement.  R-factors based 
 on F^2^ are statistically about twice as large as those based on F, and R- 
 factors based on ALL data will be even larger. 
; 
 
_refine_ls_structure_factor_coef  Fsqd  
_refine_ls_matrix_type            full 
_refine_ls_weighting_scheme       calc  
_refine_ls_weighting_details 
 'calc w=1/[\s^2^(Fo^2^)+(0.0329P)^2^+4.3093P] where P=(Fo^2^+2Fc^2^)/3' 
_atom_sites_solution_primary      direct 
_atom_sites_solution_secondary    difmap 
_atom_sites_solution_hydrogens    geom 
_refine_ls_hydrogen_treatment     constr
_refine_ls_extinction_method      none 
_refine_ls_extinction_coef        ? 
_refine_ls_number_reflns          7682 
_refine_ls_number_parameters      478 
_refine_ls_number_restraints      0 
_refine_ls_R_factor_all           0.0363 
_refine_ls_R_factor_gt            0.0266 
_refine_ls_wR_factor_ref          0.0671 
_refine_ls_wR_factor_gt           0.0646 
_refine_ls_goodness_of_fit_ref    1.038 
_refine_ls_restrained_S_all       1.038 
_refine_ls_shift/su_max           0.001 
_refine_ls_shift/su_mean          0.000 
 
loop_ 
 _atom_site_label 
 _atom_site_type_symbol 
 _atom_site_fract_x 
 _atom_site_fract_y 
 _atom_site_fract_z 
 _atom_site_U_iso_or_equiv 
 _atom_site_adp_type 
 _atom_site_occupancy 
 _atom_site_symmetry_multiplicity 
 _atom_site_calc_flag 
 _atom_site_refinement_flags 
 _atom_site_disorder_assembly 
 _atom_site_disorder_group 
Ge1 Ge 0.134746(6) 0.53931(2) 0.335918(8) 0.02126(5) Uani 1 1 d . . . 
Ge2 Ge 0.138634(6) 0.24509(2) 0.342073(8) 0.02191(5) Uani 1 1 d . . . 
C11 C 0.10550(6) 0.6195(2) 0.39209(8) 0.0232(4) Uani 1 1 d . . . 
C12 C 0.06888(6) 0.7068(2) 0.37893(8) 0.0248(4) Uani 1 1 d . . . 
C13 C 0.04819(6) 0.7445(2) 0.42035(9) 0.0279(4) Uani 1 1 d . . . 
C14 C 0.06358(6) 0.6935(2) 0.47711(9) 0.0288(4) Uani 1 1 d . . . 
C15 C 0.09998(6) 0.6066(2) 0.49221(8) 0.0261(4) Uani 1 1 d . . . 
C16 C 0.12003(5) 0.5725(2) 0.44996(8) 0.0233(4) Uani 1 1 d . . . 
C21 C 0.10573(6) 0.5994(2) 0.25545(8) 0.0246(4) Uani 1 1 d . . . 
C22 C 0.12287(6) 0.6812(2) 0.21673(8) 0.0274(4) Uani 1 1 d . . . 
C23 C 0.10376(6) 0.6894(3) 0.15739(8) 0.0306(4) Uani 1 1 d . . . 
C24 C 0.06608(6) 0.6144(3) 0.13562(8) 0.0318(4) Uani 1 1 d . . . 
C25 C 0.04730(6) 0.5366(3) 0.17275(9) 0.0305(4) Uani 1 1 d . . . 
C26 C 0.06722(6) 0.5303(2) 0.23149(8) 0.0257(4) Uani 1 1 d . . . 
C31 C 0.19136(5) 0.6268(2) 0.35562(8) 0.0237(4) Uani 1 1 d . . . 
C32 C 0.21887(6) 0.5658(2) 0.32643(8) 0.0297(4) Uani 1 1 d . . . 
C33 C 0.26090(6) 0.5987(3) 0.34270(10) 0.0378(5) Uani 1 1 d . . . 
C34 C 0.27632(6) 0.6965(3) 0.38993(10) 0.0402(5) Uani 1 1 d . . . 
C35 C 0.25019(7) 0.7623(3) 0.41970(9) 0.0358(5) Uani 1 1 d . . . 
C36 C 0.20830(6) 0.7274(2) 0.40200(9) 0.0283(4) Uani 1 1 d . . . 
C41 C 0.10968(6) 0.1648(2) 0.26510(8) 0.0247(4) Uani 1 1 d . . . 
C42 C 0.07324(7) 0.0767(2) 0.25741(9) 0.0329(5) Uani 1 1 d . . . 
H42 H 0.0638 0.0481 0.2905 0.039 Uiso 1 1 calc R . . 
C43 C 0.05052(7) 0.0301(3) 0.20212(10) 0.0405(5) Uani 1 1 d . . . 
H43 H 0.0257 -0.0298 0.1975 0.049 Uiso 1 1 calc R . . 
C44 C 0.06400(7) 0.0706(3) 0.15371(9) 0.0374(5) Uani 1 1 d . . . 
H44 H 0.0482 0.0397 0.1158 0.045 Uiso 1 1 calc R . . 
C45 C 0.10033(7) 0.1557(3) 0.16031(9) 0.0352(5) Uani 1 1 d . . . 
H45 H 0.1098 0.1822 0.1270 0.042 Uiso 1 1 calc R . . 
C46 C 0.12304(6) 0.2027(3) 0.21567(9) 0.0308(4) Uani 1 1 d . . . 
H46 H 0.1480 0.2616 0.2200 0.037 Uiso 1 1 calc R . . 
C51 C 0.11097(6) 0.1827(2) 0.40141(8) 0.0242(4) Uani 1 1 d . . . 
C52 C 0.06985(6) 0.2274(2) 0.39614(9) 0.0295(4) Uani 1 1 d . . . 
H52 H 0.0548 0.2819 0.3619 0.035 Uiso 1 1 calc R . . 
C53 C 0.05072(7) 0.1935(3) 0.44004(10) 0.0358(5) Uani 1 1 d . . . 
H53 H 0.0227 0.2248 0.4359 0.043 Uiso 1 1 calc R . . 
C54 C 0.07243(7) 0.1145(3) 0.48963(9) 0.0383(5) Uani 1 1 d . . . 
H54 H 0.0594 0.0920 0.5199 0.046 Uiso 1 1 calc R . . 
C55 C 0.11299(8) 0.0676(3) 0.49558(9) 0.0369(5) Uani 1 1 d . . . 
H55 H 0.1277 0.0119 0.5297 0.044 Uiso 1 1 calc R . . 
C56 C 0.13244(6) 0.1017(2) 0.45177(8) 0.0288(4) Uani 1 1 d . . . 
H56 H 0.1604 0.0697 0.4562 0.035 Uiso 1 1 calc R . . 
C61 C 0.19744(6) 0.1915(2) 0.36290(8) 0.0266(4) Uani 1 1 d . . . 
C62 C 0.21408(7) 0.0978(3) 0.32599(9) 0.0360(5) Uani 1 1 d . . . 
H62 H 0.1961 0.0490 0.2926 0.043 Uiso 1 1 calc R . . 
C63 C 0.25665(8) 0.0754(3) 0.33770(11) 0.0492(7) Uani 1 1 d . . . 
H63 H 0.2677 0.0119 0.3121 0.059 Uiso 1 1 calc R . . 
C64 C 0.28292(7) 0.1446(4) 0.38608(12) 0.0544(7) Uani 1 1 d . . . 
H64 H 0.3121 0.1304 0.3934 0.065 Uiso 1 1 calc R . . 
C65 C 0.26707(7) 0.2348(3) 0.42404(11) 0.0465(6) Uani 1 1 d . . . 
H65 H 0.2852 0.2802 0.4581 0.056 Uiso 1 1 calc R . . 
C66 C 0.22447(6) 0.2589(3) 0.41226(9) 0.0341(5) Uani 1 1 d . . . 
H66 H 0.2136 0.3222 0.4381 0.041 Uiso 1 1 calc R . . 
F12 F 0.05185(4) 0.75838(14) 0.32394(5) 0.0337(3) Uani 1 1 d . . . 
F13 F 0.01303(3) 0.83109(15) 0.40548(5) 0.0379(3) Uani 1 1 d . . . 
F14 F 0.04373(4) 0.73066(16) 0.51760(5) 0.0419(3) Uani 1 1 d . . . 
F15 F 0.11536(4) 0.55804(15) 0.54775(5) 0.0363(3) Uani 1 1 d . . . 
F16 F 0.15585(3) 0.48870(14) 0.46626(5) 0.0294(2) Uani 1 1 d . . . 
F22 F 0.15955(4) 0.75716(15) 0.23564(5) 0.0390(3) Uani 1 1 d . . . 
F23 F 0.12158(4) 0.76926(16) 0.12151(5) 0.0430(3) Uani 1 1 d . . . 
F24 F 0.04756(4) 0.61904(17) 0.07814(5) 0.0449(3) Uani 1 1 d . . . 
F25 F 0.01026(4) 0.46589(17) 0.15147(5) 0.0422(3) Uani 1 1 d . . . 
F26 F 0.04840(3) 0.45103(15) 0.26698(5) 0.0330(3) Uani 1 1 d . . . 
F32 F 0.20431(4) 0.46866(15) 0.28002(5) 0.0370(3) Uani 1 1 d . . . 
F33 F 0.28646(4) 0.5349(2) 0.31358(7) 0.0551(4) Uani 1 1 d . . . 
F34 F 0.31703(4) 0.7304(2) 0.40637(7) 0.0609(4) Uani 1 1 d . . . 
F35 F 0.26503(4) 0.86180(17) 0.46471(6) 0.0494(4) Uani 1 1 d . . . 
F36 F 0.18400(4) 0.79695(14) 0.43217(5) 0.0365(3) Uani 1 1 d . . . 
 
loop_ 
 _atom_site_aniso_label 
 _atom_site_aniso_U_11 
 _atom_site_aniso_U_22 
 _atom_site_aniso_U_33 
 _atom_site_aniso_U_23 
 _atom_site_aniso_U_13 
 _atom_site_aniso_U_12 
Ge1 0.01802(9) 0.02714(11) 0.01828(9) 0.00164(7) 0.00417(7) -0.00122(7) 
Ge2 0.01931(10) 0.02765(11) 0.01892(9) 0.00054(7) 0.00531(7) -0.00007(8) 
C11 0.0211(8) 0.0259(9) 0.0228(9) -0.0017(7) 0.0060(7) -0.0030(7) 
C12 0.0231(9) 0.0257(9) 0.0244(9) 0.0024(7) 0.0044(7) -0.0020(7) 
C13 0.0205(9) 0.0268(10) 0.0359(11) -0.0029(8) 0.0069(8) -0.0002(8) 
C14 0.0287(10) 0.0311(10) 0.0307(10) -0.0072(8) 0.0148(8) -0.0063(8) 
C15 0.0273(9) 0.0301(10) 0.0205(9) -0.0014(7) 0.0055(7) -0.0061(8) 
C16 0.0204(9) 0.0234(9) 0.0255(9) -0.0017(7) 0.0049(7) -0.0017(7) 
C21 0.0239(9) 0.0285(10) 0.0215(9) 0.0025(7) 0.0065(7) 0.0025(7) 
C22 0.0241(9) 0.0321(10) 0.0259(9) 0.0043(8) 0.0062(7) 0.0032(8) 
C23 0.0327(10) 0.0379(11) 0.0245(10) 0.0094(8) 0.0131(8) 0.0102(9) 
C24 0.0308(10) 0.0438(12) 0.0188(9) 0.0010(8) 0.0030(8) 0.0144(9) 
C25 0.0229(9) 0.0371(11) 0.0278(10) -0.0022(8) 0.0003(8) 0.0056(8) 
C26 0.0228(9) 0.0300(10) 0.0239(9) 0.0033(8) 0.0057(7) 0.0037(8) 
C31 0.0194(8) 0.0274(10) 0.0237(9) 0.0049(7) 0.0044(7) -0.0034(7) 
C32 0.0287(10) 0.0336(11) 0.0272(10) 0.0045(8) 0.0081(8) -0.0041(8) 
C33 0.0264(10) 0.0501(14) 0.0414(12) 0.0110(10) 0.0164(9) 0.0003(9) 
C34 0.0197(10) 0.0547(14) 0.0424(12) 0.0132(11) 0.0015(9) -0.0107(9) 
C35 0.0322(11) 0.0405(12) 0.0297(10) 0.0059(9) -0.0009(8) -0.0131(9) 
C36 0.0272(10) 0.0296(10) 0.0275(10) 0.0050(8) 0.0060(8) -0.0034(8) 
C41 0.0250(9) 0.0267(9) 0.0215(9) -0.0010(7) 0.0042(7) 0.0016(8) 
C42 0.0358(11) 0.0352(11) 0.0294(10) -0.0044(8) 0.0118(9) -0.0091(9) 
C43 0.0352(11) 0.0463(13) 0.0394(12) -0.0141(10) 0.0087(10) -0.0149(10) 
C44 0.0376(12) 0.0440(13) 0.0276(10) -0.0104(9) 0.0031(9) -0.0017(10) 
C45 0.0385(11) 0.0448(13) 0.0229(10) -0.0037(9) 0.0092(9) 0.0004(10) 
C46 0.0277(10) 0.0387(12) 0.0265(10) -0.0025(8) 0.0080(8) -0.0039(8) 
C51 0.0261(9) 0.0251(9) 0.0222(9) -0.0020(7) 0.0076(7) -0.0035(7) 
C52 0.0279(10) 0.0333(11) 0.0280(10) 0.0022(8) 0.0086(8) -0.0002(8) 
C53 0.0327(11) 0.0407(12) 0.0394(12) -0.0052(10) 0.0190(9) -0.0060(9) 
C54 0.0513(14) 0.0396(12) 0.0311(11) -0.0044(9) 0.0233(10) -0.0123(10) 
C55 0.0548(14) 0.0335(11) 0.0211(9) 0.0036(8) 0.0075(9) -0.0039(10) 
C56 0.0318(10) 0.0281(10) 0.0250(10) -0.0007(8) 0.0049(8) 0.0001(8) 
C61 0.0221(9) 0.0319(10) 0.0266(9) 0.0076(8) 0.0077(7) 0.0034(8) 
C62 0.0342(11) 0.0452(13) 0.0315(11) 0.0087(9) 0.0137(9) 0.0094(9) 
C63 0.0410(13) 0.0669(17) 0.0494(15) 0.0224(12) 0.0288(12) 0.0240(12) 
C64 0.0238(11) 0.078(2) 0.0630(17) 0.0363(15) 0.0147(11) 0.0119(12) 
C65 0.0264(11) 0.0600(16) 0.0472(14) 0.0196(12) -0.0005(10) -0.0027(10) 
C66 0.0281(10) 0.0396(12) 0.0322(11) 0.0078(9) 0.0038(8) 0.0014(9) 
F12 0.0329(6) 0.0393(7) 0.0272(6) 0.0085(5) 0.0053(5) 0.0087(5) 
F13 0.0263(6) 0.0400(7) 0.0479(7) -0.0005(6) 0.0109(5) 0.0087(5) 
F14 0.0389(7) 0.0564(8) 0.0374(7) -0.0072(6) 0.0221(6) 0.0018(6) 
F15 0.0373(7) 0.0506(7) 0.0205(5) 0.0019(5) 0.0066(5) -0.0033(6) 
F16 0.0238(5) 0.0363(6) 0.0255(6) 0.0012(5) 0.0017(4) 0.0053(5) 
F22 0.0317(6) 0.0486(8) 0.0355(7) 0.0115(6) 0.0070(5) -0.0106(5) 
F23 0.0436(7) 0.0591(9) 0.0305(6) 0.0177(6) 0.0176(6) 0.0093(6) 
F24 0.0442(7) 0.0679(9) 0.0187(6) 0.0020(6) 0.0015(5) 0.0169(7) 
F25 0.0267(6) 0.0564(8) 0.0362(7) -0.0037(6) -0.0046(5) -0.0029(6) 
F26 0.0236(6) 0.0427(7) 0.0321(6) 0.0075(5) 0.0063(5) -0.0039(5) 
F32 0.0380(7) 0.0448(7) 0.0331(6) -0.0045(5) 0.0181(5) -0.0069(6) 
F33 0.0333(7) 0.0796(11) 0.0615(9) 0.0050(8) 0.0282(7) 0.0018(7) 
F34 0.0218(6) 0.0899(12) 0.0662(10) 0.0081(8) 0.0032(6) -0.0177(7) 
F35 0.0492(8) 0.0561(9) 0.0359(7) -0.0021(6) -0.0011(6) -0.0274(7) 
F36 0.0363(7) 0.0354(7) 0.0384(7) -0.0099(5) 0.0110(5) -0.0064(5) 
 
_geom_special_details 
; 
 All esds (except the esd in the dihedral angle between two l.s. planes) 
 are estimated using the full covariance matrix.  The cell esds are taken 
 into account individually in the estimation of esds in distances, angles 
 and torsion angles; correlations between esds in cell parameters are only 
 used when they are defined by crystal symmetry.  An approximate (isotropic) 
 treatment of cell esds is used for estimating esds involving l.s. planes. 
; 
 
loop_ 
 _geom_bond_atom_site_label_1 
 _geom_bond_atom_site_label_2 
 _geom_bond_distance 
 _geom_bond_site_symmetry_2 
 _geom_bond_publ_flag 
Ge1 C21 1.9624(18) . ? 
Ge1 C11 1.9634(18) . ? 
Ge1 C31 1.9636(18) . ? 
Ge1 Ge2 2.4623(4) . ? 
Ge2 C41 1.9445(18) . ? 
Ge2 C51 1.9447(18) . ? 
Ge2 C61 1.9454(18) . ? 
C11 C16 1.385(3) . ? 
C11 C12 1.386(3) . ? 
C12 F12 1.347(2) . ? 
C12 C13 1.376(3) . ? 
C13 F13 1.344(2) . ? 
C13 C14 1.375(3) . ? 
C14 F14 1.337(2) . ? 
C14 C15 1.379(3) . ? 
C15 F15 1.343(2) . ? 
C15 C16 1.372(3) . ? 
C16 F16 1.351(2) . ? 
C21 C22 1.383(3) . ? 
C21 C26 1.386(3) . ? 
C22 F22 1.346(2) . ? 
C22 C23 1.384(3) . ? 
C23 F23 1.337(2) . ? 
C23 C24 1.377(3) . ? 
C24 F24 1.340(2) . ? 
C24 C25 1.371(3) . ? 
C25 F25 1.342(2) . ? 
C25 C26 1.376(3) . ? 
C26 F26 1.348(2) . ? 
C31 C36 1.380(3) . ? 
C31 C32 1.383(3) . ? 
C32 F32 1.350(2) . ? 
C32 C33 1.380(3) . ? 
C33 F33 1.340(3) . ? 
C33 C34 1.371(3) . ? 
C34 F34 1.341(2) . ? 
C34 C35 1.372(3) . ? 
C35 F35 1.339(2) . ? 
C35 C36 1.380(3) . ? 
C36 F36 1.345(2) . ? 
C41 C42 1.391(3) . ? 
C41 C46 1.394(3) . ? 
C42 C43 1.385(3) . ? 
C42 H42 0.9500 . ? 
C43 C44 1.380(3) . ? 
C43 H43 0.9500 . ? 
C44 C45 1.378(3) . ? 
C44 H44 0.9500 . ? 
C45 C46 1.387(3) . ? 
C45 H45 0.9500 . ? 
C46 H46 0.9500 . ? 
C51 C56 1.394(3) . ? 
C51 C52 1.395(3) . ? 
C52 C53 1.385(3) . ? 
C52 H52 0.9500 . ? 
C53 C54 1.376(3) . ? 
C53 H53 0.9500 . ? 
C54 C55 1.380(3) . ? 
C54 H54 0.9500 . ? 
C55 C56 1.390(3) . ? 
C55 H55 0.9500 . ? 
C56 H56 0.9500 . ? 
C61 C62 1.392(3) . ? 
C61 C66 1.394(3) . ? 
C62 C63 1.386(3) . ? 
C62 H62 0.9500 . ? 
C63 C64 1.374(4) . ? 
C63 H63 0.9500 . ? 
C64 C65 1.380(4) . ? 
C64 H64 0.9500 . ? 
C65 C66 1.389(3) . ? 
C65 H65 0.9500 . ? 
C66 H66 0.9500 . ? 
 
loop_ 
 _geom_angle_atom_site_label_1 
 _geom_angle_atom_site_label_2 
 _geom_angle_atom_site_label_3 
 _geom_angle 
 _geom_angle_site_symmetry_1 
 _geom_angle_site_symmetry_3 
 _geom_angle_publ_flag 
C21 Ge1 C11 111.40(8) . . ? 
C21 Ge1 C31 109.49(8) . . ? 
C11 Ge1 C31 109.30(8) . . ? 
C21 Ge1 Ge2 108.51(6) . . ? 
C11 Ge1 Ge2 109.15(5) . . ? 
C31 Ge1 Ge2 108.95(5) . . ? 
C41 Ge2 C51 111.85(8) . . ? 
C41 Ge2 C61 112.19(8) . . ? 
C51 Ge2 C61 113.19(8) . . ? 
C41 Ge2 Ge1 106.44(6) . . ? 
C51 Ge2 Ge1 106.41(6) . . ? 
C61 Ge2 Ge1 106.17(6) . . ? 
C16 C11 C12 115.48(17) . . ? 
C16 C11 Ge1 117.84(14) . . ? 
C12 C11 Ge1 126.36(14) . . ? 
F12 C12 C13 116.95(16) . . ? 
F12 C12 C11 120.54(16) . . ? 
C13 C12 C11 122.50(17) . . ? 
F13 C13 C14 119.91(17) . . ? 
F13 C13 C12 120.19(18) . . ? 
C14 C13 C12 119.90(17) . . ? 
F14 C14 C13 120.12(18) . . ? 
F14 C14 C15 120.31(18) . . ? 
C13 C14 C15 119.56(17) . . ? 
F15 C15 C16 121.23(17) . . ? 
F15 C15 C14 119.75(17) . . ? 
C16 C15 C14 119.02(17) . . ? 
F16 C16 C15 117.60(16) . . ? 
F16 C16 C11 118.87(16) . . ? 
C15 C16 C11 123.53(17) . . ? 
C22 C21 C26 115.76(17) . . ? 
C22 C21 Ge1 125.89(14) . . ? 
C26 C21 Ge1 117.29(14) . . ? 
F22 C22 C21 120.70(17) . . ? 
F22 C22 C23 116.78(17) . . ? 
C21 C22 C23 122.52(18) . . ? 
F23 C23 C24 120.23(17) . . ? 
F23 C23 C22 120.47(19) . . ? 
C24 C23 C22 119.30(18) . . ? 
F24 C24 C25 119.95(19) . . ? 
F24 C24 C23 119.95(19) . . ? 
C25 C24 C23 120.10(17) . . ? 
F25 C25 C24 119.92(17) . . ? 
F25 C25 C26 120.99(19) . . ? 
C24 C25 C26 119.08(18) . . ? 
F26 C26 C25 117.97(17) . . ? 
F26 C26 C21 118.86(16) . . ? 
C25 C26 C21 123.17(18) . . ? 
C36 C31 C32 115.79(17) . . ? 
C36 C31 Ge1 125.62(14) . . ? 
C32 C31 Ge1 117.88(14) . . ? 
F32 C32 C33 117.94(19) . . ? 
F32 C32 C31 118.97(17) . . ? 
C33 C32 C31 123.10(19) . . ? 
F33 C33 C34 120.25(19) . . ? 
F33 C33 C32 121.0(2) . . ? 
C34 C33 C32 118.8(2) . . ? 
F34 C34 C33 119.8(2) . . ? 
F34 C34 C35 119.9(2) . . ? 
C33 C34 C35 120.35(18) . . ? 
F35 C35 C34 120.39(19) . . ? 
F35 C35 C36 120.4(2) . . ? 
C34 C35 C36 119.2(2) . . ? 
F36 C36 C31 120.50(17) . . ? 
F36 C36 C35 116.80(18) . . ? 
C31 C36 C35 122.70(19) . . ? 
C42 C41 C46 118.13(17) . . ? 
C42 C41 Ge2 120.44(14) . . ? 
C46 C41 Ge2 121.29(14) . . ? 
C43 C42 C41 120.95(19) . . ? 
C43 C42 H42 119.5 . . ? 
C41 C42 H42 119.5 . . ? 
C44 C43 C42 120.0(2) . . ? 
C44 C43 H43 120.0 . . ? 
C42 C43 H43 120.0 . . ? 
C45 C44 C43 120.11(19) . . ? 
C45 C44 H44 119.9 . . ? 
C43 C44 H44 119.9 . . ? 
C44 C45 C46 119.90(19) . . ? 
C44 C45 H45 120.1 . . ? 
C46 C45 H45 120.1 . . ? 
C45 C46 C41 120.91(19) . . ? 
C45 C46 H46 119.5 . . ? 
C41 C46 H46 119.5 . . ? 
C56 C51 C52 118.56(17) . . ? 
C56 C51 Ge2 120.92(14) . . ? 
C52 C51 Ge2 120.39(14) . . ? 
C53 C52 C51 120.97(19) . . ? 
C53 C52 H52 119.5 . . ? 
C51 C52 H52 119.5 . . ? 
C54 C53 C52 119.7(2) . . ? 
C54 C53 H53 120.1 . . ? 
C52 C53 H53 120.1 . . ? 
C53 C54 C55 120.35(19) . . ? 
C53 C54 H54 119.8 . . ? 
C55 C54 H54 119.8 . . ? 
C54 C55 C56 120.23(19) . . ? 
C54 C55 H55 119.9 . . ? 
C56 C55 H55 119.9 . . ? 
C55 C56 C51 120.15(19) . . ? 
C55 C56 H56 119.9 . . ? 
C51 C56 H56 119.9 . . ? 
C62 C61 C66 118.48(18) . . ? 
C62 C61 Ge2 120.79(15) . . ? 
C66 C61 Ge2 120.43(15) . . ? 
C63 C62 C61 120.4(2) . . ? 
C63 C62 H62 119.8 . . ? 
C61 C62 H62 119.8 . . ? 
C64 C63 C62 120.3(2) . . ? 
C64 C63 H63 119.8 . . ? 
C62 C63 H63 119.8 . . ? 
C63 C64 C65 120.2(2) . . ? 
C63 C64 H64 119.9 . . ? 
C65 C64 H64 119.9 . . ? 
C64 C65 C66 119.7(2) . . ? 
C64 C65 H65 120.2 . . ? 
C66 C65 H65 120.2 . . ? 
C65 C66 C61 120.8(2) . . ? 
C65 C66 H66 119.6 . . ? 
C61 C66 H66 119.6 . . ? 
 
_diffrn_measured_fraction_theta_max    1.000 
_diffrn_reflns_theta_full              28.00 
_diffrn_measured_fraction_theta_full   1.000 
_refine_diff_density_max    0.418 
_refine_diff_density_min   -0.251 
_refine_diff_density_rms    0.061 
 
